# Supplementary material
Source: PubMed Central journal article supplement (PMC7972521)

# Regulatory variant prioritization and colocalization with eQTL for PCL-total

## Contents

---

|                                                                                                                  |    |
|------------------------------------------------------------------------------------------------------------------|----|
| Figure 1: Top associated SNPs and their overlap across phenotypes and their role as quantitative trait loci..... | 2  |
| Table 1: QTL associations for independent phenotype-specific SNPs.....                                           | 3  |
| Table 2: Colocalization analysis for genes that were significant for brain-tissue TWAS of PCL-total.....         | 44 |

## Figure 1: Top associated SNPs and their overlap across phenotypes and their role as quantitative trait loci

To understand the biological effect of SNPs associated with PTSD phenotypes, we analyzed top SNPs (at suggestive threshold  $5e-6$ ) for their unique and overlapping distribution across the four phenotypes. The top SNPs for each phenotype were LD pruned ( $r^2=0.2$ ,  $kb=250$ ) to obtain independent signals. The Venn figure shows the distribution of independent SNPs and non-overlapping SNPs across phenotypes are 87 (Hyperarousal), 49 (Avoidance), 62 (Reexperiencing), and 36 (PCL-total).

These non-overlapping or phenotype-specific SNPs were tested for their QTL associations for protein (all tissues), DNA methylation (brain tissues), and splicing (brain tissues) from the QTLbase. These QTL associations are shown as Venn figures for each phenotype. Detailed tabular results are shown in Table 1.

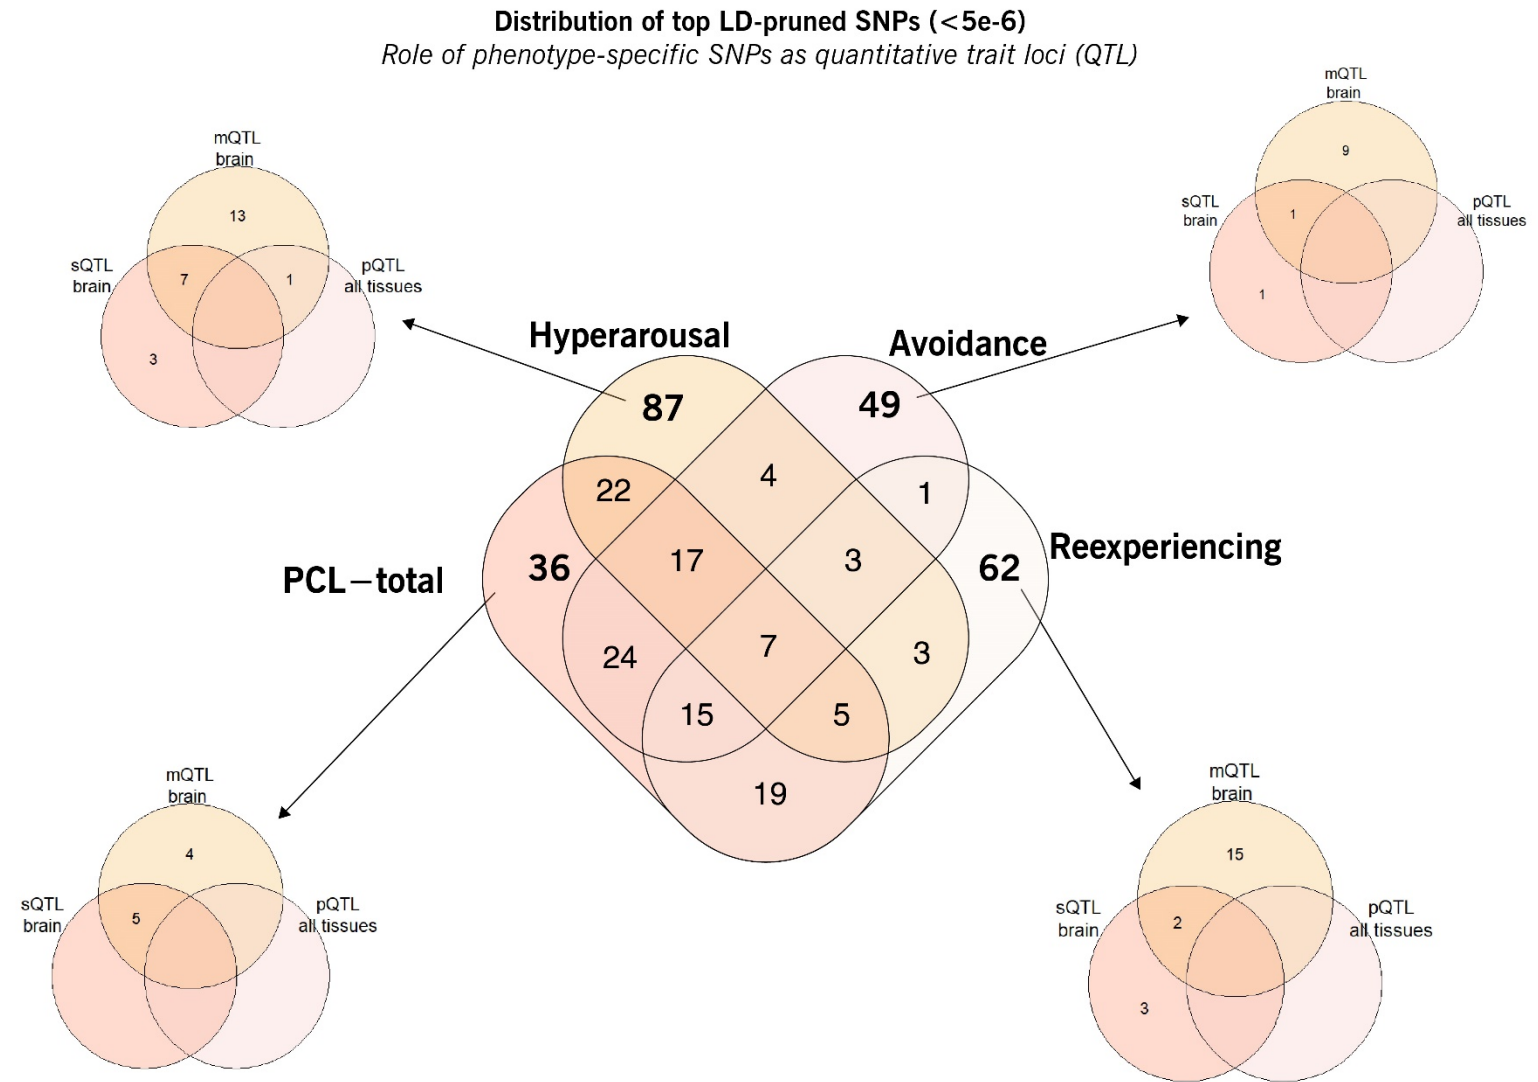

sQTL: splicing quantitative trait loci  
 mQTL: DNA methylation quantitative trait loci  
 pQTL: protein quantitative trait loci

**Table 1: QTL associations for independent phenotype-specific SNPs**

The table presents details of the SNPs and associated genes extracted from the data available from QTLbase (<http://mulinlab.org/qtlbase>). The p-values are two-sided from regression analysis for the gene-tissue expression tested in the respective studies [PMID: Journal: Year is presented in the table] and p-values lower than 1e-6 (0.05/20000 genes) are reported; correcting for number of genome-wide genes.

| Avoidance_S NPS |  |  | SNP       |  | Mappe d_gene | Trait_c hr | Trait_s tart | Trait_e nd | Pvalue   | Source id | PMID     | xQTL | Tissue                  | Popula tion | Sampl e_size | Journa l            | Year | Genom e | Descri be |
|-----------------|--|--|-----------|--|--------------|------------|--------------|------------|----------|-----------|----------|------|-------------------------|-------------|--------------|---------------------|------|---------|-----------|
|                 |  |  | rs2532423 |  | NULL         | 17         | 43662625     | 43662625   | 1.79E-47 | 103       | 26619357 | mQTL | Brain                   | EUR         | 166          | Nature neuroscience | 2015 | hg19    | NA        |
|                 |  |  | rs2532423 |  | NULL         | 17         | 43663208     | 43663208   | 1.19E-85 | 103       | 26619357 | mQTL | Brain                   | EUR         | 166          | Nature neuroscience | 2015 | hg19    | NA        |
|                 |  |  | rs2532423 |  | NULL         | 17         | 43662623     | 43662623   | 1.87E-37 | 103       | 26619357 | mQTL | Brain                   | EUR         | 166          | Nature neuroscience | 2015 | hg19    | NA        |
|                 |  |  | rs2532423 |  | NULL         | 17         | 43663579     | 43663579   | 1.08E-66 | 103       | 26619357 | mQTL | Brain                   | EUR         | 166          | Nature neuroscience | 2015 | hg19    | NA        |
|                 |  |  | rs2532423 |  | NULL         | 17         | 46940121     | 46940121   | 2.06E-11 | 104       | 26619358 | mQTL | Brain-Prefrontal_Cortex | MIX         | 258          | Nature neuroscience | 2015 | hg19    | NA        |
|                 |  |  | rs2532423 |  | NULL         | 17         | 46911531     | 46911531   | 3.22E-38 | 104       | 26619358 | mQTL | Brain-Prefrontal_Cortex | MIX         | 258          | Nature neuroscience | 2015 | hg19    | NA        |
|                 |  |  | rs2532423 |  | NULL         | 17         | 46946887     | 46946887   | 4.67E-38 | 104       | 26619358 | mQTL | Brain-Prefro            | MIX         | 258          | Nature neuroscience | 2015 | hg19    | NA        |

|  |  |  |               |  |            |    |               |               |              |     |              |                 |                                     |     |     |                            |      |      |    |
|--|--|--|---------------|--|------------|----|---------------|---------------|--------------|-----|--------------|-----------------|-------------------------------------|-----|-----|----------------------------|------|------|----|
|  |  |  |               |  |            |    |               |               |              |     |              | ntal_C<br>ortex |                                     |     |     |                            |      |      |    |
|  |  |  | rs2532<br>423 |  | NULL       | 17 | 46914<br>259  | 46914<br>259  | 1.00E-<br>08 | 104 | 26619<br>358 | mQTL            | Brain-<br>Prefro<br>ntal_C<br>ortex | MIX | 258 | Nature<br>neuros<br>cience | 2015 | hg19 | NA |
|  |  |  | rs4513<br>468 |  | EDNRB      | 13 | 78550<br>373  | 78550<br>373  | 9.61E-<br>09 | 103 | 26619<br>357 | mQTL            | Brain                               | EUR | 166 | Nature<br>neuros<br>cience | 2015 | hg19 | NA |
|  |  |  | rs4513<br>468 |  | NULL       | 3  | 18760<br>629  | 18760<br>629  | 6.86E-<br>10 | 104 | 26619<br>358 | mQTL            | Brain-<br>Prefro<br>ntal_C<br>ortex | MIX | 258 | Nature<br>neuros<br>cience | 2015 | hg19 | NA |
|  |  |  | rs9973<br>16  |  | LRGUK      | 7  | 13417<br>5563 | 13417<br>5563 | 2.19E-<br>14 | 104 | 26619<br>358 | mQTL            | Brain-<br>Prefro<br>ntal_C<br>ortex | MIX | 258 | Nature<br>neuros<br>cience | 2015 | hg19 | NA |
|  |  |  | rs6581<br>131 |  | R3HD<br>M2 | 12 | 55931<br>375  | 55931<br>375  | 1.40E-<br>14 | 74  | 20485<br>568 | mQTL            | Brain-<br>Frontal<br>_Corte<br>x    | EUR | 150 | PLoS<br>geneti<br>cs       | 2010 | hg19 | NA |
|  |  |  | rs6581<br>131 |  | R3HD<br>M2 | 12 | 55921<br>029  | 55921<br>029  | 4.42E-<br>20 | 74  | 20485<br>568 | mQTL            | Brain-<br>Frontal<br>_Corte<br>x    | EUR | 150 | PLoS<br>geneti<br>cs       | 2010 | hg19 | NA |
|  |  |  | rs6581<br>131 |  | R3HD<br>M2 | 12 | 55931<br>375  | 55931<br>375  | 6.55E-<br>11 | 75  | 20485<br>568 | mQTL            | Brain-<br>Tempo<br>ral_Cor<br>tex   | EUR | 150 | PLoS<br>geneti<br>cs       | 2010 | hg19 | NA |
|  |  |  | rs6581<br>131 |  | R3HD<br>M2 | 12 | 55921<br>029  | 55921<br>029  | 2.50E-<br>18 | 75  | 20485<br>568 | mQTL            | Brain-<br>Tempo<br>ral_Cor<br>tex   | EUR | 150 | PLoS<br>geneti<br>cs       | 2010 | hg19 | NA |

|  |  |  |           |  |          |    |          |          |          |     |          |      |                         |     |     |                     |      |      |    |
|--|--|--|-----------|--|----------|----|----------|----------|----------|-----|----------|------|-------------------------|-----|-----|---------------------|------|------|----|
|  |  |  | rs6581131 |  | R3HDM2   | 12 | 55931375 | 55931375 | 7.43E-09 | 76  | 20485568 | mQTL | Brain-Pons              | EUR | 150 | PLoS genetics       | 2010 | hg19 | NA |
|  |  |  | rs6581131 |  | R3HDM2   | 12 | 55921029 | 55921029 | 3.60E-13 | 76  | 20485568 | mQTL | Brain-Pons              | EUR | 150 | PLoS genetics       | 2010 | hg19 | NA |
|  |  |  | rs6581131 |  | NULL     | 12 | 57780204 | 57780204 | 6.76E-36 | 103 | 26619357 | mQTL | Brain                   | EUR | 166 | Nature neuroscience | 2015 | hg19 | NA |
|  |  |  | rs6581131 |  | STAC3    | 12 | 59358841 | 59358841 | 1.91E-27 | 104 | 26619358 | mQTL | Brain-Prefrontal_Cortex | MIX | 258 | Nature neuroscience | 2015 | hg19 | NA |
|  |  |  | rs6581131 |  | STAC3    | 12 | 59358391 | 59358391 | 4.03E-13 | 104 | 26619358 | mQTL | Brain-Prefrontal_Cortex | MIX | 258 | Nature neuroscience | 2015 | hg19 | NA |
|  |  |  | rs6581131 |  | NDUFA4L2 | 12 | 59348282 | 59348282 | 3.66E-11 | 104 | 26619358 | mQTL | Brain-Prefrontal_Cortex | MIX | 258 | Nature neuroscience | 2015 | hg19 | NA |
|  |  |  | rs6581131 |  | NDUFA4L2 | 12 | 59349212 | 59349212 | 4.38E-67 | 104 | 26619358 | mQTL | Brain-Prefrontal_Cortex | MIX | 258 | Nature neuroscience | 2015 | hg19 | NA |
|  |  |  | rs6581131 |  | NDUFA4L2 | 12 | 59348588 | 59348588 | 9.85E-61 | 104 | 26619358 | mQTL | Brain-Prefrontal_Cortex | MIX | 258 | Nature neuroscience | 2015 | hg19 | NA |
|  |  |  | rs6581131 |  | NDUFA4L2 | 12 | 59349072 | 59349072 | 3.71E-50 | 104 | 26619358 | mQTL | Brain-Prefrontal_Cortex | MIX | 258 | Nature neuroscience | 2015 | hg19 | NA |

|  |  |  |           |  |          |    |          |          |          |     |          |      |                         |     |     |                        |      |      |                       |
|--|--|--|-----------|--|----------|----|----------|----------|----------|-----|----------|------|-------------------------|-----|-----|------------------------|------|------|-----------------------|
|  |  |  | rs6581131 |  | NDUFA4L2 | 12 | 59348495 | 59348495 | 1.15E-63 | 104 | 26619358 | mQTL | Brain-Prefrontal_Cortex | MIX | 258 | Nature neuroscience    | 2015 | hg19 | NA                    |
|  |  |  | rs6581131 |  | NDUFA4L2 | 12 | 57634677 | 57634677 | 1.44E-16 | 152 | 30203047 | mQTL | Brain                   | MIX | 487 | Nucleic acids research | 2019 | hg19 | original reported cis |
|  |  |  | rs6581131 |  | NDUFA4L2 | 12 | 57634549 | 57634549 | 3.46E-17 | 152 | 30203047 | mQTL | Brain                   | MIX | 487 | Nucleic acids research | 2019 | hg19 | original reported cis |
|  |  |  | rs6581131 |  | NDUFA4L2 | 12 | 57635479 | 57635479 | 9.69E-13 | 152 | 30203047 | mQTL | Brain                   | MIX | 487 | Nucleic acids research | 2019 | hg19 | original reported cis |
|  |  |  | rs6581131 |  | NDUFA4L2 | 12 | 57634555 | 57634555 | 6.20E-16 | 152 | 30203047 | mQTL | Brain                   | MIX | 487 | Nucleic acids research | 2019 | hg19 | original reported cis |
|  |  |  | rs6581131 |  | NDUFA4L2 | 12 | 57634762 | 57634762 | 7.69E-17 | 152 | 30203047 | mQTL | Brain                   | MIX | 487 | Nucleic acids research | 2019 | hg19 | original reported cis |
|  |  |  | rs6581131 |  | NDUFA4L2 | 12 | 57634665 | 57634665 | 1.50E-17 | 152 | 30203047 | mQTL | Brain                   | MIX | 487 | Nucleic acids research | 2019 | hg19 | original reported cis |
|  |  |  | rs9468976 |  | HLA-B    | 6  | 31217838 | 31217838 | 4.54E-07 | 104 | 26619358 | mQTL | Brain-Prefrontal_Cortex | MIX | 258 | Nature neuroscience    | 2015 | hg19 | NA                    |

|  |  |  |            |  |         |    |           |           |          |     |          |      |                         |     |     |                        |      |      |                       |
|--|--|--|------------|--|---------|----|-----------|-----------|----------|-----|----------|------|-------------------------|-----|-----|------------------------|------|------|-----------------------|
|  |  |  | rs9468976  |  | NULL    | 6  | 31213454  | 31213454  | 9.70E-16 | 104 | 26619358 | mQTL | Brain-Prefrontal_Cortex | MIX | 258 | Nature neuroscience    | 2015 | hg19 | NA                    |
|  |  |  | rs6512258  |  | NULL    | 19 | 18575975  | 18575975  | 9.86E-07 | 104 | 26619358 | mQTL | Brain-Prefrontal_Cortex | MIX | 258 | Nature neuroscience    | 2015 | hg19 | NA                    |
|  |  |  | rs73791756 |  | WDR55   | 5  | 140044315 | 140044315 | 1.24E-09 | 103 | 26619357 | mQTL | Brain                   | EUR | 166 | Nature neuroscience    | 2015 | hg19 | NA                    |
|  |  |  | rs2820292  |  | IPO9    | 1  | 203531099 | 203531099 | 4.28E-11 | 104 | 26619358 | mQTL | Brain-Prefrontal_Cortex | MIX | 258 | Nature neuroscience    | 2015 | hg19 | NA                    |
|  |  |  | rs10746    |  | ACOT12  | 5  | 80689492  | 80689492  | 1.58E-14 | 96  | 25206360 | mQTL | Brain-Prefrontal_Cortex | MIX | 216 | Frontiers in genetics  | 2014 | hg19 | NA                    |
|  |  |  | rs2234391  |  | DCUN1D1 | 3  | 182698605 | 182698605 | 1.91E-09 | 103 | 26619357 | mQTL | Brain                   | EUR | 166 | Nature neuroscience    | 2015 | hg19 | NA                    |
|  |  |  | rs2234391  |  | MST1R   | 3  | 49941425  | 49941425  | 7.27E-17 | 144 | 30203047 | mQTL | Brain                   | MIX | 501 | Nucleic acids research | 2019 | hg19 | original reported cis |
|  |  |  | rs2234391  |  | GMPPB   | 3  | 49761600  | 49761600  | 8.16E-12 | 144 | 30203047 | mQTL | Brain                   | MIX | 501 | Nucleic acids research | 2019 | hg19 | original reported cis |
|  |  |  | rs2234391  |  | DCUN1D1 | 3  | 182698605 | 182698605 | 1.01E-25 | 145 | 30203047 | mQTL | Brain                   | MIX | 501 | Nucleic acids research | 2019 | hg19 | original report       |

|                        |  |  |             |  |                    |                  |                    |                  |               |                  |             |             |               |                   |                    |                        |             |               |                         |
|------------------------|--|--|-------------|--|--------------------|------------------|--------------------|------------------|---------------|------------------|-------------|-------------|---------------|-------------------|--------------------|------------------------|-------------|---------------|-------------------------|
|                        |  |  |             |  |                    |                  |                    |                  |               |                  |             |             |               |                   |                    |                        |             |               | ed trans                |
|                        |  |  | rs2234391   |  | CRBN               | 3                | 3221576            | 3221576          | 6.88E-69      | 145              | 30203047    | mQTL        | Brain         | MIX               | 501                | Nucleic acids research | 2019        | hg19          | original reported trans |
|                        |  |  | rs2234391   |  | RBM5               | 3                | 50126178           | 50126178         | 4.52E-11      | 152              | 30203047    | mQTL        | Brain         | MIX               | 487                | Nucleic acids research | 2019        | hg19          | original reported cis   |
|                        |  |  | rs2234391   |  | DCUN1D1            | 3                | 182698605          | 182698605        | 3.95E-20      | 153              | 30203047    | mQTL        | Brain         | MIX               | 487                | Nucleic acids research | 2019        | hg19          | original reported trans |
|                        |  |  | rs2234391   |  | CRBN               | 3                | 3221576            | 3221576          | 4.79E-67      | 153              | 30203047    | mQTL        | Brain         | MIX               | 487                | Nucleic acids research | 2019        | hg19          | original reported trans |
|                        |  |  | rs144132576 |  | FAM182B            | 20               | 25848786           | 25848786         | 4.79E-07      | 70               | 30545857    | sQTL        | Brain         | MIX               | 1866               | Science                | 2018        | hg19          | NA                      |
|                        |  |  | rs2234391   |  | RNF123             | 3                | 49726971           | 49758962         | 1.17E-18      | 51               | 30329095    | sQTL        | Brain         | MIX               | 514                | Nucleic acids research | 2019        | hg19          | NA                      |
| <b>Re-experiencing</b> |  |  | <b>SNP</b>  |  | <b>Mapped_gene</b> | <b>Trait_chr</b> | <b>Trait_start</b> | <b>Trait_end</b> | <b>Pvalue</b> | <b>Source_id</b> | <b>PMID</b> | <b>xQTL</b> | <b>Tissue</b> | <b>Population</b> | <b>Sample_size</b> | <b>Journal</b>         | <b>Year</b> | <b>Genome</b> | <b>Describe</b>         |
|                        |  |  | rs242925    |  | NULL               | 17               | 43663208           | 43663208         | 2.68E-09      | 103              | 26619357    | mQTL        | Brain         | EUR               | 166                | Nature neuroscience    | 2015        | hg19          | NA                      |



|  |  |  |            |  |       |    |           |           |          |     |          |      |                         |     |     |                        |      |      |                       |
|--|--|--|------------|--|-------|----|-----------|-----------|----------|-----|----------|------|-------------------------|-----|-----|------------------------|------|------|-----------------------|
|  |  |  | rs10767734 |  | NULL  | 11 | 28701525  | 28701525  | 4.48E-07 | 104 | 26619358 | mQTL | Brain-Prefrontal_Cortex | MIX | 258 | Nature neuroscience    | 2015 | hg19 | NA                    |
|  |  |  | rs62073233 |  | NULL  | 17 | 43662625  | 43662625  | 1.71E-36 | 103 | 26619357 | mQTL | Brain                   | EUR | 166 | Nature neuroscience    | 2015 | hg19 | NA                    |
|  |  |  | rs62073233 |  | NULL  | 17 | 43663208  | 43663208  | 9.42E-60 | 103 | 26619357 | mQTL | Brain                   | EUR | 166 | Nature neuroscience    | 2015 | hg19 | NA                    |
|  |  |  | rs62073233 |  | NULL  | 17 | 43662623  | 43662623  | 1.01E-30 | 103 | 26619357 | mQTL | Brain                   | EUR | 166 | Nature neuroscience    | 2015 | hg19 | NA                    |
|  |  |  | rs62073233 |  | NULL  | 17 | 43663579  | 43663579  | 4.65E-63 | 103 | 26619357 | mQTL | Brain                   | EUR | 166 | Nature neuroscience    | 2015 | hg19 | NA                    |
|  |  |  | rs199441   |  | NULL  | 17 | 43662625  | 43662625  | 6.42E-24 | 103 | 26619357 | mQTL | Brain                   | EUR | 166 | Nature neuroscience    | 2015 | hg19 | NA                    |
|  |  |  | rs199441   |  | NULL  | 17 | 43663208  | 43663208  | 9.05E-31 | 103 | 26619357 | mQTL | Brain                   | EUR | 166 | Nature neuroscience    | 2015 | hg19 | NA                    |
|  |  |  | rs199441   |  | NULL  | 17 | 43662623  | 43662623  | 3.35E-19 | 103 | 26619357 | mQTL | Brain                   | EUR | 166 | Nature neuroscience    | 2015 | hg19 | NA                    |
|  |  |  | rs199441   |  | NULL  | 17 | 43663579  | 43663579  | 3.34E-36 | 103 | 26619357 | mQTL | Brain                   | EUR | 166 | Nature neuroscience    | 2015 | hg19 | NA                    |
|  |  |  | rs67529088 |  | SRPK2 | 7  | 105027541 | 105027541 | 1.73E-12 | 144 | 30203047 | mQTL | Brain                   | MIX | 501 | Nucleic acids research | 2019 | hg19 | original reported cis |

|  |  |  |            |  |         |    |           |           |          |     |          |      |                         |     |     |                        |      |      |                       |
|--|--|--|------------|--|---------|----|-----------|-----------|----------|-----|----------|------|-------------------------|-----|-----|------------------------|------|------|-----------------------|
|  |  |  | rs11536594 |  | NULL    | 7  | 127743667 | 127743667 | 1.83E-16 | 103 | 26619357 | mQTL | Brain                   | EUR | 166 | Nature neuroscience    | 2015 | hg19 | NA                    |
|  |  |  | rs11536594 |  | SND1    | 7  | 127291580 | 127291580 | 1.44E-11 | 152 | 30203047 | mQTL | Brain                   | MIX | 487 | Nucleic acids research | 2019 | hg19 | original reported cis |
|  |  |  | rs11536594 |  | SND1    | 7  | 127291747 | 127291747 | 4.24E-13 | 152 | 30203047 | mQTL | Brain                   | MIX | 487 | Nucleic acids research | 2019 | hg19 | original reported cis |
|  |  |  | rs8056104  |  | NULL    | 16 | 54354640  | 54354640  | 1.54E-11 | 103 | 26619357 | mQTL | Brain                   | EUR | 166 | Nature neuroscience    | 2015 | hg19 | NA                    |
|  |  |  | rs8056104  |  | NULL    | 16 | 54354640  | 54354640  | 3.86E-17 | 124 | 28869584 | mQTL | Brain-Prefrontal_Cortex | EUR | 468 | Nature neuroscience    | 2017 | hg19 | NA                    |
|  |  |  | rs66548047 |  | CFAP157 | 9  | 131429354 | 131429354 | 1.95E-15 | 104 | 26619358 | mQTL | Brain-Prefrontal_Cortex | MIX | 258 | Nature neuroscience    | 2015 | hg19 | NA                    |
|  |  |  | rs66548047 |  | PTRH1   | 9  | 131436865 | 131436865 | 8.64E-09 | 104 | 26619358 | mQTL | Brain-Prefrontal_Cortex | MIX | 258 | Nature neuroscience    | 2015 | hg19 | NA                    |
|  |  |  | rs66548047 |  | CFAP157 | 9  | 130469175 | 130469175 | 1.73E-13 | 124 | 28869584 | mQTL | Brain-Prefrontal_Cortex | EUR | 468 | Nature neuroscience    | 2017 | hg19 | NA                    |
|  |  |  | rs576859   |  | CTNND1  | 11 | 57528838  | 57528838  | 2.40E-09 | 71  | 20215007 | mQTL | Brain-Cerebellum        | EUR | 153 | American journal of    | 2010 | hg19 | original reported cis |

|  |  |  |            |  |        |    |           |           |          |     |          |      |                         |     |                |                        |      |      |                         |
|--|--|--|------------|--|--------|----|-----------|-----------|----------|-----|----------|------|-------------------------|-----|----------------|------------------------|------|------|-------------------------|
|  |  |  |            |  |        |    |           |           |          |     |          |      |                         |     | human genetics |                        |      |      |                         |
|  |  |  | rs576859   |  | CTNND1 | 11 | 57585705  | 57585705  | 4.34E-13 | 144 | 30203047 | mQTL | Brain                   | MIX | 501            | Nucleic acids research | 2019 | hg19 | original reported cis   |
|  |  |  | rs4571     |  | NULL   | 4  | 152727874 | 152727874 | 1.24E-13 | 144 | 30203047 | mQTL | Brain                   | MIX | 501            | Nucleic acids research | 2019 | hg19 | original reported cis   |
|  |  |  | rs7216107  |  | UTP6   | 17 | 30228624  | 30228624  | 4.13E-24 | 144 | 30203047 | mQTL | Brain                   | MIX | 501            | Nucleic acids research | 2019 | hg19 | original reported cis   |
|  |  |  | rs7216107  |  | NULL   | 11 | 113659929 | 113659929 | 4.45E-12 | 145 | 30203047 | mQTL | Brain                   | MIX | 501            | Nucleic acids research | 2019 | hg19 | original reported trans |
|  |  |  | rs7216107  |  | UTP6   | 17 | 30228624  | 30228624  | 2.01E-26 | 152 | 30203047 | mQTL | Brain                   | MIX | 487            | Nucleic acids research | 2019 | hg19 | original reported cis   |
|  |  |  | rs7216107  |  | NULL   | 11 | 113659929 | 113659929 | 3.66E-27 | 153 | 30203047 | mQTL | Brain                   | MIX | 487            | Nucleic acids research | 2019 | hg19 | original reported trans |
|  |  |  | rs11903674 |  | NULL   | 2  | 105629677 | 105629677 | 1.64E-13 | 104 | 26619358 | mQTL | Brain-Prefrontal_Cortex | MIX | 258            | Nature neuroscience    | 2015 | hg19 | NA                      |

|  |  |  |            |  |         |    |           |           |          |     |          |      |                         |     |     |                        |      |      |                       |
|--|--|--|------------|--|---------|----|-----------|-----------|----------|-----|----------|------|-------------------------|-----|-----|------------------------|------|------|-----------------------|
|  |  |  | rs340876   |  | PROX1   | 1  | 214162604 | 214162604 | 1.43E-09 | 103 | 26619357 | mQTL | Brain                   | EUR | 166 | Nature neuroscience    | 2015 | hg19 | NA                    |
|  |  |  | rs340876   |  | NULL    | 1  | 216090403 | 216090403 | 2.56E-09 | 104 | 26619358 | mQTL | Brain-Prefrontal_Cortex | MIX | 258 | Nature neuroscience    | 2015 | hg19 | NA                    |
|  |  |  | rs340876   |  | NULL    | 1  | 216090219 | 216090219 | 1.31E-18 | 104 | 26619358 | mQTL | Brain-Prefrontal_Cortex | MIX | 258 | Nature neuroscience    | 2015 | hg19 | NA                    |
|  |  |  | rs340876   |  | NULL    | 1  | 216092414 | 216092414 | 9.52E-19 | 104 | 26619358 | mQTL | Brain-Prefrontal_Cortex | MIX | 258 | Nature neuroscience    | 2015 | hg19 | NA                    |
|  |  |  | rs340876   |  | NULL    | 1  | 214157306 | 214157306 | 3.97E-15 | 124 | 28869584 | mQTL | Brain-Prefrontal_Cortex | EUR | 468 | Nature neuroscience    | 2017 | hg19 | NA                    |
|  |  |  | rs77344887 |  | PLEKHA5 | 12 | 19282374  | 19282374  | 2.24E-15 | 152 | 30203047 | mQTL | Brain                   | MIX | 487 | Nucleic acids research | 2019 | hg19 | original reported cis |
|  |  |  | rs13217929 |  | SYNJ2   | 6  | 158595048 | 158595048 | 6.48E-22 | 104 | 26619358 | mQTL | Brain-Prefrontal_Cortex | MIX | 258 | Nature neuroscience    | 2015 | hg19 | NA                    |
|  |  |  | rs13217929 |  | SYNJ2   | 6  | 158588200 | 158588200 | 7.28E-08 | 104 | 26619358 | mQTL | Brain-Prefrontal_Cortex | MIX | 258 | Nature neuroscience    | 2015 | hg19 | NA                    |
|  |  |  | rs13217929 |  | SYNJ2   | 6  | 158587965 | 158587965 | 1.79E-07 | 104 | 26619358 | mQTL | Brain-Prefro            | MIX | 258 | Nature neuroscience    | 2015 | hg19 | NA                    |

|  |  |  |                |  |             |    |               |               |              |     |              |                 |                                     |     |     |                                  |      |      |    |
|--|--|--|----------------|--|-------------|----|---------------|---------------|--------------|-----|--------------|-----------------|-------------------------------------|-----|-----|----------------------------------|------|------|----|
|  |  |  |                |  |             |    |               |               |              |     |              | ntal_C<br>ortex |                                     |     |     |                                  |      |      |    |
|  |  |  | rs1321<br>7929 |  | SYNJ2       | 6  | 15859<br>5080 | 15859<br>5080 | 2.07E-<br>21 | 104 | 26619<br>358 | mQTL            | Brain-<br>Prefro<br>ntal_C<br>ortex | MIX | 258 | Nature<br>neuros<br>cience       | 2015 | hg19 | NA |
|  |  |  | rs1321<br>7929 |  | SYNJ2       | 6  | 15851<br>5036 | 15851<br>5036 | 3.83E-<br>10 | 126 | 29142<br>228 | mQTL            | Brain-<br>Hippoc<br>ampus           | EUR | 110 | Nature<br>comm<br>unicati<br>ons | 2017 | hg19 | NA |
|  |  |  | rs1076<br>5777 |  | MTMR<br>2   | 11 | 96018<br>821  | 96018<br>821  | 5.86E-<br>13 | 104 | 26619<br>358 | mQTL            | Brain-<br>Prefro<br>ntal_C<br>ortex | MIX | 258 | Nature<br>neuros<br>cience       | 2015 | hg19 | NA |
|  |  |  | rs2020<br>996  |  | TMEM<br>63C | 14 | 77648<br>248  | 77648<br>248  | 4.64E-<br>10 | 103 | 26619<br>357 | mQTL            | Brain                               | EUR | 166 | Nature<br>neuros<br>cience       | 2015 | hg19 | NA |
|  |  |  | rs2020<br>996  |  | TMEM<br>63C | 14 | 78577<br>951  | 78577<br>951  | 4.72E-<br>12 | 104 | 26619<br>358 | mQTL            | Brain-<br>Prefro<br>ntal_C<br>ortex | MIX | 258 | Nature<br>neuros<br>cience       | 2015 | hg19 | NA |
|  |  |  | rs2020<br>996  |  | TMEM<br>63C | 14 | 78581<br>423  | 78581<br>423  | 3.34E-<br>20 | 104 | 26619<br>358 | mQTL            | Brain-<br>Prefro<br>ntal_C<br>ortex | MIX | 258 | Nature<br>neuros<br>cience       | 2015 | hg19 | NA |
|  |  |  | rs2020<br>996  |  | TMEM<br>63C | 14 | 78578<br>495  | 78578<br>495  | 7.79E-<br>10 | 104 | 26619<br>358 | mQTL            | Brain-<br>Prefro<br>ntal_C<br>ortex | MIX | 258 | Nature<br>neuros<br>cience       | 2015 | hg19 | NA |
|  |  |  | rs2020<br>996  |  | TMEM<br>63C | 14 | 77647<br>704  | 77647<br>704  | 3.01E-<br>22 | 124 | 28869<br>584 | mQTL            | Brain-<br>Prefro<br>ntal_C<br>ortex | EUR | 468 | Nature<br>neuros<br>cience       | 2017 | hg19 | NA |

|  |  |  |           |  |                 |    |          |          |          |     |          |      |       |     |      |                        |      |      |                       |
|--|--|--|-----------|--|-----------------|----|----------|----------|----------|-----|----------|------|-------|-----|------|------------------------|------|------|-----------------------|
|  |  |  | rs2020996 |  | TMEM63C         | 14 | 77651176 | 77651176 | 1.71E-18 | 144 | 30203047 | mQTL | Brain | MIX | 501  | Nucleic acids research | 2019 | hg19 | original reported cis |
|  |  |  | rs2020996 |  | TMEM63C         | 14 | 77648248 | 77648248 | 2.32E-27 | 144 | 30203047 | mQTL | Brain | MIX | 501  | Nucleic acids research | 2019 | hg19 | original reported cis |
|  |  |  | rs2020996 |  | TMEM63C         | 14 | 77651176 | 77651176 | 5.31E-13 | 152 | 30203047 | mQTL | Brain | MIX | 487  | Nucleic acids research | 2019 | hg19 | original reported cis |
|  |  |  | rs2020996 |  | TMEM63C         | 14 | 77648248 | 77648248 | 2.69E-24 | 152 | 30203047 | mQTL | Brain | MIX | 487  | Nucleic acids research | 2019 | hg19 | original reported cis |
|  |  |  | rs199441  |  | KANSL1          | 17 | 44123487 | 44123487 | 1.08E-57 | 70  | 30545857 | sQTL | Brain | MIX | 1866 | Science                | 2018 | hg19 | NA                    |
|  |  |  | rs199441  |  | KANSL1          | 17 | 44270942 | 44270942 | 9.45E-16 | 70  | 30545857 | sQTL | Brain | MIX | 1866 | Science                | 2018 | hg19 | NA                    |
|  |  |  | rs199441  |  | ARL17B          | 17 | 44370099 | 44370099 | 2.25E-40 | 70  | 30545857 | sQTL | Brain | MIX | 1866 | Science                | 2018 | hg19 | NA                    |
|  |  |  | rs199441  |  | LINCO2210-CRHR1 | 17 | 43861673 | 43861673 | 3.53E-07 | 70  | 30545857 | sQTL | Brain | MIX | 1866 | Science                | 2018 | hg19 | NA                    |
|  |  |  | rs199441  |  | MAPT-AS1        | 17 | 43971932 | 43971932 | 7.21E-18 | 70  | 30545857 | sQTL | Brain | MIX | 1866 | Science                | 2018 | hg19 | NA                    |
|  |  |  | rs199441  |  | NULL            | 17 | 44320972 | 44320972 | 9.80E-07 | 70  | 30545857 | sQTL | Brain | MIX | 1866 | Science                | 2018 | hg19 | NA                    |
|  |  |  | rs199441  |  | NULL            | 17 | 44337972 | 44337972 | 2.07E-21 | 70  | 30545857 | sQTL | Brain | MIX | 1866 | Science                | 2018 | hg19 | NA                    |
|  |  |  | rs199441  |  | NULL            | 17 | 44588877 | 44588877 | 1.12E-94 | 70  | 30545857 | sQTL | Brain | MIX | 1866 | Science                | 2018 | hg19 | NA                    |

|                     |  |  |            |  |                    |                  |                    |                  |               |                  |             |             |                         |                   |                    |                        |             |               |                 |
|---------------------|--|--|------------|--|--------------------|------------------|--------------------|------------------|---------------|------------------|-------------|-------------|-------------------------|-------------------|--------------------|------------------------|-------------|---------------|-----------------|
|                     |  |  | rs12065833 |  | KYAT3              | 1                | 89401456           | 89458636         | 6.47E-10      | 46               | 30329095    | sQTL        | Brain                   | MIX               | 499                | Nucleic acids research | 2019        | hg19          | NA              |
|                     |  |  | rs12065833 |  | KYAT3              | 1                | 89454038           | 89454038         | 1.19E-07      | 70               | 30545857    | sQTL        | Brain                   | MIX               | 1866               | Science                | 2018        | hg19          | NA              |
|                     |  |  | rs576859   |  | MED19              | 11               | 57471186           | 57479795         | 2.96E-07      | 51               | 30329095    | sQTL        | Brain                   | MIX               | 514                | Nucleic acids research | 2019        | hg19          | NA              |
|                     |  |  | rs13339023 |  | NULL               | 16               | 77224732           | 77224732         | 1.02E-21      | 70               | 30545857    | sQTL        | Brain                   | MIX               | 1866               | Science                | 2018        | hg19          | NA              |
|                     |  |  | rs7516275  |  | DPH5               | 1                | 101491434          | 101491434        | 3.44E-34      | 70               | 30545857    | sQTL        | Brain                   | MIX               | 1866               | Science                | 2018        | hg19          | NA              |
|                     |  |  | rs7516275  |  | EXTL2              | 1                | 101360368          | 101360368        | 9.94E-13      | 70               | 30545857    | sQTL        | Brain                   | MIX               | 1866               | Science                | 2018        | hg19          | NA              |
| <b>Hyperarousal</b> |  |  | <b>SNP</b> |  | <b>Mapped_gene</b> | <b>Trait_chr</b> | <b>Trait_start</b> | <b>Trait_end</b> | <b>Pvalue</b> | <b>Source_id</b> | <b>PMID</b> | <b>xQTL</b> | <b>Tissue</b>           | <b>Population</b> | <b>Sample_size</b> | <b>Journal</b>         | <b>Year</b> | <b>Genome</b> | <b>Describe</b> |
|                     |  |  | rs55789728 |  | MAD1L1             | 7                | 2142827            | 2142827          | 8.63E-11      | 104              | 26619358    | mQTL        | Brain-Prefrontal_Cortex | MIX               | 258                | Nature neuroscience    | 2015        | hg19          | NA              |
|                     |  |  | rs55789728 |  | MAD1L1             | 7                | 2128264            | 2128264          | 1.68E-07      | 104              | 26619358    | mQTL        | Brain-Prefrontal_Cortex | MIX               | 258                | Nature neuroscience    | 2015        | hg19          | NA              |
|                     |  |  | rs55789728 |  | MAD1L1             | 7                | 2142924            | 2142924          | 6.10E-16      | 104              | 26619358    | mQTL        | Brain-Prefrontal_Cortex | MIX               | 258                | Nature neuroscience    | 2015        | hg19          | NA              |
|                     |  |  | rs55789728 |  | MAD1L1             | 7                | 2142718            | 2142718          | 2.58E-11      | 104              | 26619358    | mQTL        | Brain-Prefrontal_Cortex | MIX               | 258                | Nature neuroscience    | 2015        | hg19          | NA              |

|  |  |  |            |  |        |    |          |          |          |     |          |      |                         |     |     |                        |      |      |                       |
|--|--|--|------------|--|--------|----|----------|----------|----------|-----|----------|------|-------------------------|-----|-----|------------------------|------|------|-----------------------|
|  |  |  | rs55789728 |  | MAD1L1 | 7  | 2139795  | 2139795  | 2.50E-18 | 104 | 26619358 | mQTL | Brain-Prefrontal_Cortex | MIX | 258 | Nature neuroscience    | 2015 | hg19 | NA                    |
|  |  |  | rs55789728 |  | MAD1L1 | 7  | 2128102  | 2128102  | 3.21E-09 | 104 | 26619358 | mQTL | Brain-Prefrontal_Cortex | MIX | 258 | Nature neuroscience    | 2015 | hg19 | NA                    |
|  |  |  | rs55789728 |  | MAD1L1 | 7  | 2141054  | 2141054  | 8.82E-13 | 104 | 26619358 | mQTL | Brain-Prefrontal_Cortex | MIX | 258 | Nature neuroscience    | 2015 | hg19 | NA                    |
|  |  |  | rs55789728 |  | MAD1L1 | 7  | 2139503  | 2139503  | 4.62E-22 | 104 | 26619358 | mQTL | Brain-Prefrontal_Cortex | MIX | 258 | Nature neuroscience    | 2015 | hg19 | NA                    |
|  |  |  | rs55789728 |  | MAD1L1 | 7  | 2109244  | 2109244  | 6.93E-25 | 124 | 28869584 | mQTL | Brain-Prefrontal_Cortex | EUR | 468 | Nature neuroscience    | 2017 | hg19 | NA                    |
|  |  |  | rs55789728 |  | MAD1L1 | 7  | 2109890  | 2109890  | 4.60E-17 | 124 | 28869584 | mQTL | Brain-Prefrontal_Cortex | EUR | 468 | Nature neuroscience    | 2017 | hg19 | NA                    |
|  |  |  | rs55789728 |  | MAD1L1 | 7  | 1882776  | 1882776  | 1.56E-11 | 144 | 30203047 | mQTL | Brain                   | MIX | 501 | Nucleic acids research | 2019 | hg19 | original reported cis |
|  |  |  | rs55789728 |  | MAD1L1 | 7  | 1970798  | 1970798  | 4.46E-13 | 144 | 30203047 | mQTL | Brain                   | MIX | 501 | Nucleic acids research | 2019 | hg19 | original reported cis |
|  |  |  | rs55789728 |  | STARD3 | 17 | 37793320 | 37793320 | 7.22E-15 | 145 | 30203047 | mQTL | Brain                   | MIX | 501 | Nucleic acids          | 2019 | hg19 | original              |



|  |  |  |                |  |              |    |              |              |              |     |              |      |                  |     |          |                               |      |          |                             |
|--|--|--|----------------|--|--------------|----|--------------|--------------|--------------|-----|--------------|------|------------------|-----|----------|-------------------------------|------|----------|-----------------------------|
|  |  |  |                |  |              |    |              |              |              |     |              |      |                  |     | research |                               |      | reported |                             |
|  |  |  | rs5578<br>9728 |  | MAD1<br>L1   | 7  | 20878<br>43  | 20878<br>43  | 1.32E-<br>12 | 152 | 30203<br>047 | mQTL | Brain            | MIX | 487      | Nuclei<br>c acids<br>research | 2019 | hg19     | original<br>reported<br>cis |
|  |  |  | rs5578<br>9728 |  | MAD1<br>L1   | 7  | 20503<br>86  | 20503<br>86  | 6.18E-<br>12 | 152 | 30203<br>047 | mQTL | Brain            | MIX | 487      | Nuclei<br>c acids<br>research | 2019 | hg19     | original<br>reported<br>cis |
|  |  |  | rs5578<br>9728 |  | MAD1<br>L1   | 7  | 20597<br>96  | 20597<br>96  | 4.78E-<br>16 | 152 | 30203<br>047 | mQTL | Brain            | MIX | 487      | Nuclei<br>c acids<br>research | 2019 | hg19     | original<br>reported<br>cis |
|  |  |  | rs5578<br>9728 |  | MAD1<br>L1   | 7  | 19707<br>98  | 19707<br>98  | 9.98E-<br>16 | 152 | 30203<br>047 | mQTL | Brain            | MIX | 487      | Nuclei<br>c acids<br>research | 2019 | hg19     | original<br>reported<br>cis |
|  |  |  | rs7398<br>4391 |  | NULL         | 17 | 43662<br>625 | 43662<br>625 | 4.62E-<br>22 | 103 | 26619<br>357 | mQTL | Brain            | EUR | 166      | Nature<br>neurosci<br>ence    | 2015 | hg19     | NA                          |
|  |  |  | rs7398<br>4391 |  | NULL         | 17 | 43663<br>208 | 43663<br>208 | 5.79E-<br>32 | 103 | 26619<br>357 | mQTL | Brain            | EUR | 166      | Nature<br>neurosci<br>ence    | 2015 | hg19     | NA                          |
|  |  |  | rs7398<br>4391 |  | NULL         | 17 | 43662<br>623 | 43662<br>623 | 8.17E-<br>16 | 103 | 26619<br>357 | mQTL | Brain            | EUR | 166      | Nature<br>neurosci<br>ence    | 2015 | hg19     | NA                          |
|  |  |  | rs7398<br>4391 |  | NULL         | 17 | 43663<br>579 | 43663<br>579 | 3.19E-<br>24 | 103 | 26619<br>357 | mQTL | Brain            | EUR | 166      | Nature<br>neurosci<br>ence    | 2015 | hg19     | NA                          |
|  |  |  | rs7398<br>4391 |  | ARHGA<br>P27 | 17 | 46148<br>145 | 46148<br>145 | 7.81E-<br>13 | 104 | 26619<br>358 | mQTL | Brain-<br>Prefro | MIX | 258      | Nature<br>neurosci<br>ence    | 2015 | hg19     | NA                          |

|  |  |  |                |  |              |    |              |              |              |     |              |                 |                                     |     |     |                            |      |      |    |
|--|--|--|----------------|--|--------------|----|--------------|--------------|--------------|-----|--------------|-----------------|-------------------------------------|-----|-----|----------------------------|------|------|----|
|  |  |  |                |  |              |    |              |              |              |     |              | ntal_C<br>ortex |                                     |     |     |                            |      |      |    |
|  |  |  | rs7398<br>4391 |  | ARHGA<br>P27 | 17 | 46148<br>395 | 46148<br>395 | 5.98E-<br>10 | 104 | 26619<br>358 | mQTL            | Brain-<br>Prefro<br>ntal_C<br>ortex | MIX | 258 | Nature<br>neuros<br>cience | 2015 | hg19 | NA |
|  |  |  | rs7398<br>4391 |  | ARHGA<br>P27 | 17 | 46127<br>736 | 46127<br>736 | 5.24E-<br>07 | 104 | 26619<br>358 | mQTL            | Brain-<br>Prefro<br>ntal_C<br>ortex | MIX | 258 | Nature<br>neuros<br>cience | 2015 | hg19 | NA |
|  |  |  | rs7398<br>4391 |  | ARHGA<br>P27 | 17 | 46128<br>252 | 46128<br>252 | 2.65E-<br>07 | 104 | 26619<br>358 | mQTL            | Brain-<br>Prefro<br>ntal_C<br>ortex | MIX | 258 | Nature<br>neuros<br>cience | 2015 | hg19 | NA |
|  |  |  | rs7398<br>4391 |  | ARHGA<br>P27 | 17 | 46128<br>454 | 46128<br>454 | 6.87E-<br>08 | 104 | 26619<br>358 | mQTL            | Brain-<br>Prefro<br>ntal_C<br>ortex | MIX | 258 | Nature<br>neuros<br>cience | 2015 | hg19 | NA |
|  |  |  | rs7398<br>4391 |  | ARHGA<br>P27 | 17 | 46129<br>400 | 46129<br>400 | 3.53E-<br>21 | 104 | 26619<br>358 | mQTL            | Brain-<br>Prefro<br>ntal_C<br>ortex | MIX | 258 | Nature<br>neuros<br>cience | 2015 | hg19 | NA |
|  |  |  | rs7398<br>4391 |  | ARHGA<br>P27 | 17 | 46148<br>000 | 46148<br>000 | 6.43E-<br>34 | 104 | 26619<br>358 | mQTL            | Brain-<br>Prefro<br>ntal_C<br>ortex | MIX | 258 | Nature<br>neuros<br>cience | 2015 | hg19 | NA |
|  |  |  | rs7398<br>4391 |  | ARHGA<br>P27 | 17 | 46128<br>117 | 46128<br>117 | 6.16E-<br>07 | 104 | 26619<br>358 | mQTL            | Brain-<br>Prefro<br>ntal_C<br>ortex | MIX | 258 | Nature<br>neuros<br>cience | 2015 | hg19 | NA |
|  |  |  | rs7398<br>4391 |  | ARHGA<br>P27 | 17 | 43482<br>735 | 43482<br>735 | 1.59E-<br>27 | 124 | 28869<br>584 | mQTL            | Brain-<br>Prefro<br>ntal_C<br>ortex | EUR | 468 | Nature<br>neuros<br>cience | 2017 | hg19 | NA |

|  |  |  |            |  |           |    |          |          |          |     |          |      |                         |     |     |                     |      |      |    |
|--|--|--|------------|--|-----------|----|----------|----------|----------|-----|----------|------|-------------------------|-----|-----|---------------------|------|------|----|
|  |  |  | rs73984391 |  | ARHGA P27 | 17 | 43483527 | 43483527 | 3.90E-12 | 124 | 28869584 | mQTL | Brain-Prefrontal_Cortex | EUR | 468 | Nature neuroscience | 2017 | hg19 | NA |
|  |  |  | rs73984391 |  | ARHGA P27 | 17 | 43484399 | 43484399 | 9.16E-29 | 124 | 28869584 | mQTL | Brain-Prefrontal_Cortex | EUR | 468 | Nature neuroscience | 2017 | hg19 | NA |
|  |  |  | rs2668653  |  | NULL      | 17 | 43662625 | 43662625 | 1.79E-47 | 103 | 26619357 | mQTL | Brain                   | EUR | 166 | Nature neuroscience | 2015 | hg19 | NA |
|  |  |  | rs2668653  |  | NULL      | 17 | 43663208 | 43663208 | 1.19E-85 | 103 | 26619357 | mQTL | Brain                   | EUR | 166 | Nature neuroscience | 2015 | hg19 | NA |
|  |  |  | rs2668653  |  | NULL      | 17 | 43662623 | 43662623 | 1.87E-37 | 103 | 26619357 | mQTL | Brain                   | EUR | 166 | Nature neuroscience | 2015 | hg19 | NA |
|  |  |  | rs2668653  |  | NULL      | 17 | 43663579 | 43663579 | 1.08E-66 | 103 | 26619357 | mQTL | Brain                   | EUR | 166 | Nature neuroscience | 2015 | hg19 | NA |
|  |  |  | rs2668653  |  | NULL      | 17 | 46940121 | 46940121 | 2.77E-11 | 104 | 26619358 | mQTL | Brain-Prefrontal_Cortex | MIX | 258 | Nature neuroscience | 2015 | hg19 | NA |
|  |  |  | rs2668653  |  | NULL      | 17 | 46946887 | 46946887 | 1.95E-37 | 104 | 26619358 | mQTL | Brain-Prefrontal_Cortex | MIX | 258 | Nature neuroscience | 2015 | hg19 | NA |
|  |  |  | rs2668653  |  | NULL      | 17 | 46914259 | 46914259 | 1.65E-09 | 104 | 26619358 | mQTL | Brain-Prefrontal_Cortex | MIX | 258 | Nature neuroscience | 2015 | hg19 | NA |

|  |  |  |           |  |         |   |           |           |          |     |          |      |       |     |     |                        |      |      |                         |
|--|--|--|-----------|--|---------|---|-----------|-----------|----------|-----|----------|------|-------|-----|-----|------------------------|------|------|-------------------------|
|  |  |  | rs1412049 |  | PHF2    | 9 | 96362102  | 96362102  | 2.74E-11 | 103 | 26619357 | mQTL | Brain | EUR | 166 | Nature neuroscience    | 2015 | hg19 | NA                      |
|  |  |  | rs9871654 |  | DCUN1D1 | 3 | 182698605 | 182698605 | 4.53E-09 | 103 | 26619357 | mQTL | Brain | EUR | 166 | Nature neuroscience    | 2015 | hg19 | NA                      |
|  |  |  | rs9871654 |  | MST1R   | 3 | 49941425  | 49941425  | 1.24E-15 | 144 | 30203047 | mQTL | Brain | MIX | 501 | Nucleic acids research | 2019 | hg19 | original reported cis   |
|  |  |  | rs9871654 |  | GMPPB   | 3 | 49761600  | 49761600  | 4.74E-12 | 144 | 30203047 | mQTL | Brain | MIX | 501 | Nucleic acids research | 2019 | hg19 | original reported cis   |
|  |  |  | rs9871654 |  | DCUN1D1 | 3 | 182698605 | 182698605 | 3.81E-24 | 145 | 30203047 | mQTL | Brain | MIX | 501 | Nucleic acids research | 2019 | hg19 | original reported trans |
|  |  |  | rs9871654 |  | CRBN    | 3 | 3221576   | 3221576   | 3.97E-67 | 145 | 30203047 | mQTL | Brain | MIX | 501 | Nucleic acids research | 2019 | hg19 | original reported trans |
|  |  |  | rs9871654 |  | RBM5    | 3 | 50126178  | 50126178  | 1.96E-11 | 152 | 30203047 | mQTL | Brain | MIX | 487 | Nucleic acids research | 2019 | hg19 | original reported cis   |
|  |  |  | rs9871654 |  | DCUN1D1 | 3 | 182698605 | 182698605 | 1.61E-20 | 153 | 30203047 | mQTL | Brain | MIX | 487 | Nucleic acids research | 2019 | hg19 | original reported trans |

|  |  |  |            |  |         |    |          |          |          |     |          |      |                         |     |     |                        |      |      |                         |
|--|--|--|------------|--|---------|----|----------|----------|----------|-----|----------|------|-------------------------|-----|-----|------------------------|------|------|-------------------------|
|  |  |  | rs9871654  |  | CRBN    | 3  | 3221576  | 3221576  | 1.29E-66 | 153 | 30203047 | mQTL | Brain                   | MIX | 487 | Nucleic acids research | 2019 | hg19 | original reported trans |
|  |  |  | rs58314091 |  | MAP3K14 | 17 | 43361331 | 43361331 | 6.66E-10 | 103 | 26619357 | mQTL | Brain                   | EUR | 166 | Nature neuroscience    | 2015 | hg19 | NA                      |
|  |  |  | rs2240326  |  | RBM5    | 3  | 49736940 | 49736940 | 3.69E-08 | 76  | 20485568 | mQTL | Brain-Pons              | EUR | 150 | PLoS genetics          | 2010 | hg19 | NA                      |
|  |  |  | rs2240326  |  | RBM5    | 3  | 50126028 | 50126028 | 1.08E-14 | 103 | 26619357 | mQTL | Brain                   | EUR | 166 | Nature neuroscience    | 2015 | hg19 | NA                      |
|  |  |  | rs2240326  |  | RBM5    | 3  | 50151024 | 50151024 | 2.40E-36 | 104 | 26619358 | mQTL | Brain-Prefrontal_Cortex | MIX | 258 | Nature neuroscience    | 2015 | hg19 | NA                      |
|  |  |  | rs2240326  |  | RBM5    | 3  | 50151063 | 50151063 | 1.02E-27 | 104 | 26619358 | mQTL | Brain-Prefrontal_Cortex | MIX | 258 | Nature neuroscience    | 2015 | hg19 | NA                      |
|  |  |  | rs2240326  |  | RBM5    | 3  | 50151174 | 50151174 | 2.67E-07 | 104 | 26619358 | mQTL | Brain-Prefrontal_Cortex | MIX | 258 | Nature neuroscience    | 2015 | hg19 | NA                      |
|  |  |  | rs2240326  |  | RBM5    | 3  | 50126028 | 50126028 | 7.39E-13 | 144 | 30203047 | mQTL | Brain                   | MIX | 501 | Nucleic acids research | 2019 | hg19 | original reported cis   |
|  |  |  | rs2240326  |  | RBM5    | 3  | 50126178 | 50126178 | 6.14E-17 | 144 | 30203047 | mQTL | Brain                   | MIX | 501 | Nucleic acids research | 2019 | hg19 | original reported cis   |

|  |  |  |           |  |         |    |          |          |          |     |          |      |                         |     |     |                        |      |      |                         |
|--|--|--|-----------|--|---------|----|----------|----------|----------|-----|----------|------|-------------------------|-----|-----|------------------------|------|------|-------------------------|
|  |  |  | rs2240326 |  | MST1R   | 3  | 49941425 | 49941425 | 4.07E-26 | 144 | 30203047 | mQTL | Brain                   | MIX | 501 | Nucleic acids research | 2019 | hg19 | original reported cis   |
|  |  |  | rs2240326 |  | CRBN    | 3  | 3221576  | 3221576  | 1.27E-18 | 145 | 30203047 | mQTL | Brain                   | MIX | 501 | Nucleic acids research | 2019 | hg19 | original reported trans |
|  |  |  | rs2240326 |  | RBM5    | 3  | 50126028 | 50126028 | 4.36E-15 | 152 | 30203047 | mQTL | Brain                   | MIX | 487 | Nucleic acids research | 2019 | hg19 | original reported cis   |
|  |  |  | rs2240326 |  | RBM5    | 3  | 50126178 | 50126178 | 1.99E-23 | 152 | 30203047 | mQTL | Brain                   | MIX | 487 | Nucleic acids research | 2019 | hg19 | original reported cis   |
|  |  |  | rs2240326 |  | MST1R   | 3  | 49941408 | 49941408 | 6.65E-11 | 152 | 30203047 | mQTL | Brain                   | MIX | 487 | Nucleic acids research | 2019 | hg19 | original reported cis   |
|  |  |  | rs2240326 |  | CRBN    | 3  | 3221576  | 3221576  | 1.46E-31 | 153 | 30203047 | mQTL | Brain                   | MIX | 487 | Nucleic acids research | 2019 | hg19 | original reported trans |
|  |  |  | rs2847308 |  | SELENOH | 11 | 57752101 | 57752101 | 1.53E-11 | 104 | 26619358 | mQTL | Brain-Prefrontal_Cortex | MIX | 258 | Nature neuroscience    | 2015 | hg19 | NA                      |
|  |  |  | rs2847308 |  | CTNND1  | 11 | 57585705 | 57585705 | 4.82E-14 | 144 | 30203047 | mQTL | Brain                   | MIX | 501 | Nucleic acids research | 2019 | hg19 | original reported cis   |

|  |  |  |            |  |        |   |           |           |          |     |          |      |                         |     |     |                     |      |      |    |
|--|--|--|------------|--|--------|---|-----------|-----------|----------|-----|----------|------|-------------------------|-----|-----|---------------------|------|------|----|
|  |  |  | rs11771283 |  | MAD1L1 | 7 | 2143364   | 2143364   | 1.57E-09 | 104 | 26619358 | mQTL | Brain-Prefrontal_Cortex | MIX | 258 | Nature neuroscience | 2015 | hg19 | NA |
|  |  |  | rs11771283 |  | MAD1L1 | 7 | 2153742   | 2153742   | 1.19E-07 | 104 | 26619358 | mQTL | Brain-Prefrontal_Cortex | MIX | 258 | Nature neuroscience | 2015 | hg19 | NA |
|  |  |  | rs11771283 |  | MAD1L1 | 7 | 2153755   | 2153755   | 2.02E-10 | 104 | 26619358 | mQTL | Brain-Prefrontal_Cortex | MIX | 258 | Nature neuroscience | 2015 | hg19 | NA |
|  |  |  | rs11771283 |  | MAD1L1 | 7 | 2109353   | 2109353   | 4.53E-09 | 124 | 28869584 | mQTL | Brain-Prefrontal_Cortex | EUR | 468 | Nature neuroscience | 2017 | hg19 | NA |
|  |  |  | rs11771283 |  | MAD1L1 | 7 | 2109450   | 2109450   | 5.60E-11 | 124 | 28869584 | mQTL | Brain-Prefrontal_Cortex | EUR | 468 | Nature neuroscience | 2017 | hg19 | NA |
|  |  |  | rs11771283 |  | MAD1L1 | 7 | 2114593   | 2114593   | 3.41E-10 | 124 | 28869584 | mQTL | Brain-Prefrontal_Cortex | EUR | 468 | Nature neuroscience | 2017 | hg19 | NA |
|  |  |  | rs2073512  |  | WDR55  | 5 | 140064108 | 140064108 | 3.09E-09 | 104 | 26619358 | mQTL | Brain-Prefrontal_Cortex | MIX | 258 | Nature neuroscience | 2015 | hg19 | NA |
|  |  |  | rs2073512  |  | WDR55  | 5 | 140064131 | 140064131 | 1.01E-10 | 104 | 26619358 | mQTL | Brain-Prefrontal_Cortex | MIX | 258 | Nature neuroscience | 2015 | hg19 | NA |

|  |  |  |            |  |         |    |           |           |          |     |          |      |                         |     |     |                     |      |      |    |
|--|--|--|------------|--|---------|----|-----------|-----------|----------|-----|----------|------|-------------------------|-----|-----|---------------------|------|------|----|
|  |  |  | rs2073512  |  | DND1    | 5  | 140073166 | 140073166 | 1.84E-10 | 104 | 26619358 | mQTL | Brain-Prefrontal_Cortex | MIX | 258 | Nature neuroscience | 2015 | hg19 | NA |
|  |  |  | rs56163088 |  | NRXN1   | 2  | 51386806  | 51386806  | 6.75E-07 | 104 | 26619358 | mQTL | Brain-Prefrontal_Cortex | MIX | 258 | Nature neuroscience | 2015 | hg19 | NA |
|  |  |  | rs4792849  |  | NULL    | 17 | 43663208  | 43663208  | 2.62E-10 | 103 | 26619357 | mQTL | Brain                   | EUR | 166 | Nature neuroscience | 2015 | hg19 | NA |
|  |  |  | rs28380938 |  | NULL    | 6  | 31213454  | 31213454  | 1.36E-09 | 104 | 26619358 | mQTL | Brain-Prefrontal_Cortex | MIX | 258 | Nature neuroscience | 2015 | hg19 | NA |
|  |  |  | rs1972930  |  | NULL    | 17 | 13755355  | 13755355  | 9.15E-09 | 104 | 26619358 | mQTL | Brain-Prefrontal_Cortex | MIX | 258 | Nature neuroscience | 2015 | hg19 | NA |
|  |  |  | rs16974049 |  | NULL    | 16 | 85983617  | 85983617  | 1.88E-08 | 104 | 26619358 | mQTL | Brain-Prefrontal_Cortex | MIX | 258 | Nature neuroscience | 2015 | hg19 | NA |
|  |  |  | rs7788052  |  | SDK1    | 7  | 3340860   | 3340860   | 3.21E-12 | 103 | 26619357 | mQTL | Brain                   | EUR | 166 | Nature neuroscience | 2015 | hg19 | NA |
|  |  |  | rs11074041 |  | SLCO3A1 | 15 | 94860545  | 94860545  | 2.67E-10 | 104 | 26619358 | mQTL | Brain-Prefrontal_Cortex | MIX | 258 | Nature neuroscience | 2015 | hg19 | NA |
|  |  |  | rs11074041 |  | SLCO3A1 | 15 | 92661549  | 92661549  | 3.15E-12 | 124 | 28869584 | mQTL | Brain-Prefrontal_Cortex | EUR | 468 | Nature neuroscience | 2017 | hg19 | NA |



|  |  |  |            |  |            |    |           |           |          |     |          |      |                         |     |      |                        |      |      |    |
|--|--|--|------------|--|------------|----|-----------|-----------|----------|-----|----------|------|-------------------------|-----|------|------------------------|------|------|----|
|  |  |  | rs6122049  |  | TCEA2      | 20 | 62697566  | 62697566  | 2.04E-10 | 124 | 28869584 | mQTL | Brain-Prefrontal_Cortex | EUR | 468  | Nature neuroscience    | 2017 | hg19 | NA |
|  |  |  | rs7782175  |  | LRGUK      | 7  | 134175563 | 134175563 | 7.26E-17 | 104 | 26619358 | mQTL | Brain-Prefrontal_Cortex | MIX | 258  | Nature neuroscience    | 2015 | hg19 | NA |
|  |  |  | rs6544333  |  | SLC8A1     | 2  | 40599006  | 40599006  | 2.26E-10 | 124 | 28869584 | mQTL | Brain-Prefrontal_Cortex | EUR | 468  | Nature neuroscience    | 2017 | hg19 | NA |
|  |  |  | rs3754733  |  | MAPRE3     | 2  | 27380368  | 27380368  | 2.64E-09 | 104 | 26619358 | mQTL | Brain-Prefrontal_Cortex | MIX | 258  | Nature neuroscience    | 2015 | hg19 | NA |
|  |  |  | rs3754733  |  | MAPRE3     | 2  | 27395845  | 27395845  | 1.51E-08 | 104 | 26619358 | mQTL | Brain-Prefrontal_Cortex | MIX | 258  | Nature neuroscience    | 2015 | hg19 | NA |
|  |  |  | rs3754733  |  | MAPRE3     | 2  | 27249349  | 27249349  | 4.54E-10 | 124 | 28869584 | mQTL | Brain-Prefrontal_Cortex | EUR | 468  | Nature neuroscience    | 2017 | hg19 | NA |
|  |  |  | rs55789728 |  | AC069288.1 | 7  | 2281804   | 2281804   | 1.24E-10 | 70  | 30545857 | sQTL | Brain                   | MIX | 1866 | Science                | 2018 | hg19 | NA |
|  |  |  | rs1412049  |  | FAM120AOS  | 9  | 96213806  | 96213806  | 5.27E-09 | 70  | 30545857 | sQTL | Brain                   | MIX | 1866 | Science                | 2018 | hg19 | NA |
|  |  |  | rs2887882  |  | ST7L       | 1  | 113066136 | 113163447 | 8.13E-18 | 46  | 30329095 | sQTL | Brain                   | MIX | 499  | Nucleic acids research | 2019 | hg19 | NA |
|  |  |  | rs2887882  |  | MOV10      | 1  | 113215763 | 113243368 | 6.26E-10 | 46  | 30329095 | sQTL | Brain                   | MIX | 499  | Nucleic acids          | 2019 | hg19 | NA |

|  |  |  |            |  |            |    |           |           |          |    |          |      |       |     |      |                        |      |      |    |
|--|--|--|------------|--|------------|----|-----------|-----------|----------|----|----------|------|-------|-----|------|------------------------|------|------|----|
|  |  |  |            |  |            |    |           |           |          |    |          |      |       |     |      | research               |      |      |    |
|  |  |  | rs2887882  |  | ST7L       | 1  | 113161766 | 113161766 | 9.27E-16 | 70 | 30545857 | sQTL | Brain | MIX | 1866 | Science                | 2018 | hg19 | NA |
|  |  |  | rs2887882  |  | NULL       | 1  | 113009163 | 113009163 | 1.12E-13 | 70 | 30545857 | sQTL | Brain | MIX | 1866 | Science                | 2018 | hg19 | NA |
|  |  |  | rs9871654  |  | RNF123     | 3  | 49726971  | 49758962  | 1.23E-18 | 51 | 30329095 | sQTL | Brain | MIX | 514  | Nucleic acids research | 2019 | hg19 | NA |
|  |  |  | rs9871654  |  | CAMKV      | 3  | 49907336  | 49907336  | 1.46E-13 | 70 | 30545857 | sQTL | Brain | MIX | 1866 | Science                | 2018 | hg19 | NA |
|  |  |  | rs9871654  |  | IP6K1      | 3  | 49823960  | 49823960  | 3.45E-08 | 70 | 30545857 | sQTL | Brain | MIX | 1866 | Science                | 2018 | hg19 | NA |
|  |  |  | rs2240326  |  | RBM6       | 3  | 49977440  | 50137478  | 2.35E-08 | 46 | 30329095 | sQTL | Brain | MIX | 499  | Nucleic acids research | 2019 | hg19 | NA |
|  |  |  | rs2240326  |  | RBM6       | 3  | 49977440  | 50137478  | 6.67E-17 | 51 | 30329095 | sQTL | Brain | MIX | 514  | Nucleic acids research | 2019 | hg19 | NA |
|  |  |  | rs2847308  |  | MED19      | 11 | 57471186  | 57479795  | 9.07E-07 | 51 | 30329095 | sQTL | Brain | MIX | 514  | Nucleic acids research | 2019 | hg19 | NA |
|  |  |  | rs11771283 |  | MAD1L1     | 7  | 1912392   | 1912392   | 1.44E-07 | 70 | 30545857 | sQTL | Brain | MIX | 1866 | Science                | 2018 | hg19 | NA |
|  |  |  | rs11771283 |  | AC069288.1 | 7  | 2281804   | 2281804   | 9.53E-07 | 70 | 30545857 | sQTL | Brain | MIX | 1866 | Science                | 2018 | hg19 | NA |
|  |  |  | rs12491672 |  | ZBTB20     | 3  | 114070658 | 114070658 | 2.89E-07 | 70 | 30545857 | sQTL | Brain | MIX | 1866 | Science                | 2018 | hg19 | NA |

|                  |             |  |            |                     |                  |                    |                  |               |                 |             |                         |                         |                    |                     |                     |                       |                |                                                                                                    |                                                      |
|------------------|-------------|--|------------|---------------------|------------------|--------------------|------------------|---------------|-----------------|-------------|-------------------------|-------------------------|--------------------|---------------------|---------------------|-----------------------|----------------|----------------------------------------------------------------------------------------------------|------------------------------------------------------|
|                  |             |  | rs10161037 |                     | NULL             | 12                 | 117890817        | 117890817     | 3.75E-07        | 70          | 30545857                | sQTL                    | Brain              | MIX                 | 1866                | Science               | 2018           | hg19                                                                                               | NA                                                   |
|                  |             |  | rs6122049  |                     | NULL             | 20                 | 62681189         | 62681189      | 2.76E-09        | 70          | 30545857                | sQTL                    | Brain              | MIX                 | 1866                | Science               | 2018           | hg19                                                                                               | NA                                                   |
|                  |             |  | rs2073512  |                     | CD14             | 5                  | 140011313        | 140013286     | 4.16E-36        | 13          | 30111768                | pQTL                    | Blood              | EUR                 | 6861                | Nature communications | 2018           | hg19                                                                                               | NA                                                   |
| <b>PCL-total</b> | <b>rsid</b> |  |            | <b>Mappe_d_gene</b> | <b>Trait_chr</b> | <b>Trait_start</b> | <b>Trait_end</b> | <b>Pvalue</b> | <b>Sourceid</b> | <b>PMID</b> | <b>xQTL</b>             | <b>Tissue</b>           | <b>Popula tion</b> | <b>Sampl e_size</b> | <b>Journa l</b>     | <b>Year</b>           | <b>Genom e</b> | <b>Descri be</b>                                                                                   | <b>Title</b>                                         |
|                  | rs17552977  |  | SOX6       | 11                  | 16357841         | 16357841           | 5.42E-12         | 104           | 26619358        | mQTL        | Brain-Prefrontal_Cortex | MIX                     | 258                | Nature neuroscience | 2015                | hg19                  | NA             | Mapping DNA methylation across development, genotype and schizophrenia in the human frontal cortex |                                                      |
|                  | rs547891    |  |            | SELENOH             | 11               | 57752101           | 57752101         | 1.53E-11      | 104             | 26619358    | mQTL                    | Brain-Prefrontal_Cortex | MIX                | 258                 | Nature neuroscience | 2015                  | hg19           | NA                                                                                                 | Mapping DNA methylation across development, genotype |

|  |             |  |      |        |          |          |          |          |          |          |       |       |     |                     |                         |      |      |                         |                                                                                                                     |
|--|-------------|--|------|--------|----------|----------|----------|----------|----------|----------|-------|-------|-----|---------------------|-------------------------|------|------|-------------------------|---------------------------------------------------------------------------------------------------------------------|
|  |             |  |      |        |          |          |          |          |          |          |       |       |     |                     |                         |      |      |                         | pe and schizo phreni a in the human frontal cortex                                                                  |
|  | rs547891    |  |      | CTNND1 | 11       | 57585705 | 57585705 | 4.82E-14 | 144      | 30203047 | mQTL  | Brain | MIX | 501                 | Nuclei c acids research | 2019 | hg19 | original reported cis   | Pancan-meQTL : a database to systematically evaluate the effects of genetic variants on methylation in human cancer |
|  | rs560050580 |  | NULL | 17     | 43662625 | 43662625 | 4.14E-30 | 103      | 26619357 | mQTL     | Brain | EUR   | 166 | Nature neuroscience | 2015                    | hg19 | NA   | Methylation QTLs in the |                                                                                                                     |

|  |                 |  |      |    |              |              |              |     |              |      |       |     |     |                            |      |      |    |                                                                                                                                        |
|--|-----------------|--|------|----|--------------|--------------|--------------|-----|--------------|------|-------|-----|-----|----------------------------|------|------|----|----------------------------------------------------------------------------------------------------------------------------------------|
|  |                 |  |      |    |              |              |              |     |              |      |       |     |     |                            |      |      |    | develo<br>ping<br>brain<br>and<br>their<br>enrich<br>ment in<br>schizop<br>hrenia<br>risk<br>loci                                      |
|  | rs5600<br>50580 |  | NULL | 17 | 436632<br>08 | 436632<br>08 | 1.13E-<br>44 | 103 | 266193<br>57 | mQTL | Brain | EUR | 166 | Nature<br>neuros<br>cience | 2015 | hg19 | NA | Methyl<br>ation<br>QTLs in<br>the<br>develo<br>ping<br>brain<br>and<br>their<br>enrich<br>ment in<br>schizop<br>hrenia<br>risk<br>loci |
|  | rs5600<br>50580 |  | NULL | 17 | 436626<br>23 | 436626<br>23 | 6.82E-<br>24 | 103 | 266193<br>57 | mQTL | Brain | EUR | 166 | Nature<br>neuros<br>cience | 2015 | hg19 | NA | Methyl<br>ation<br>QTLs in<br>the<br>develo<br>ping<br>brain<br>and                                                                    |

|  |             |  |        |    |          |          |          |     |          |      |                         |     |     |                     |      |      |    |                                                                                          |
|--|-------------|--|--------|----|----------|----------|----------|-----|----------|------|-------------------------|-----|-----|---------------------|------|------|----|------------------------------------------------------------------------------------------|
|  |             |  |        |    |          |          |          |     |          |      |                         |     |     |                     |      |      |    | their enrichment in schizophrenia risk loci                                              |
|  | rs560050580 |  | NULL   | 17 | 43663579 | 43663579 | 2.83E-38 | 103 | 26619357 | mQTL | Brain                   | EUR | 166 | Nature neuroscience | 2015 | hg19 | NA | Methylation QTLs in the developing brain and their enrichment in schizophrenia risk loci |
|  | rs4788878   |  | MIF4GD | 17 | 75755864 | 75755864 | 5.81E-09 | 104 | 26619358 | mQTL | Brain-Prefrontal_Cortex | MIX | 258 | Nature neuroscience | 2015 | hg19 | NA | Mapping DNA methylation across development, genotype and schizophrenia in the            |

|  |            |  |       |    |          |          |          |     |          |      |       |     |     |                        |      |      |                       |                                                                                                                      |
|--|------------|--|-------|----|----------|----------|----------|-----|----------|------|-------|-----|-----|------------------------|------|------|-----------------------|----------------------------------------------------------------------------------------------------------------------|
|  |            |  |       |    |          |          |          |     |          |      |       |     |     |                        |      |      |                       | human frontal cortex                                                                                                 |
|  | rs4788878  |  | NUP85 | 17 | 73230827 | 73230827 | 3.91E-50 | 152 | 30203047 | mQTL | Brain | MIX | 487 | Nucleic acids research | 2019 | hg19 | original reported cis | Pancan - meQTL: a database to systematically evaluate the effects of genetic variants on methylation in human cancer |
|  | rs10484587 |  | RGMB  | 5  | 98106108 | 98106108 | 4.51E-09 | 103 | 26619357 | mQTL | Brain | EUR | 166 | Nature neuroscience    | 2015 | hg19 | NA                    | Methylation QTLs in the developing brain and their enrichment in schizop                                             |

|  |            |  |      |   |          |          |          |     |          |      |                         |     |     |                        |      |      |                       |                                                                                                    |
|--|------------|--|------|---|----------|----------|----------|-----|----------|------|-------------------------|-----|-----|------------------------|------|------|-----------------------|----------------------------------------------------------------------------------------------------|
|  |            |  |      |   |          |          |          |     |          |      |                         |     |     |                        |      |      |                       | hrenia risk loci                                                                                   |
|  | rs28380933 |  | NULL | 6 | 31213454 | 31213454 | 1.46E-12 | 104 | 26619358 | mQTL | Brain-Prefrontal_Cortex | MIX | 258 | Nature neuroscience    | 2015 | hg19 | NA                    | Mapping DNA methylation across development, genotype and schizophrenia in the human frontal cortex |
|  | rs2505060  |  | NULL | 6 | 98744658 | 98744658 | 1.39E-12 | 152 | 30203047 | mQTL | Brain                   | MIX | 487 | Nucleic acids research | 2019 | hg19 | original reported cis | Pancan - meQTL: a database to systematically evaluate the effects of genetic variants on methyl    |



|  |           |  |       |   |           |           |          |     |          |      |                         |     |     |                     |      |      |    |                                                                                                    |
|--|-----------|--|-------|---|-----------|-----------|----------|-----|----------|------|-------------------------|-----|-----|---------------------|------|------|----|----------------------------------------------------------------------------------------------------|
|  |           |  |       |   |           |           |          |     |          |      |                         |     |     |                     |      |      |    | ation in human cancer                                                                              |
|  | rs6964432 |  | LRGUK | 7 | 134175563 | 134175563 | 1.23E-15 | 104 | 26619358 | mQTL | Brain-Prefrontal_Cortex | MIX | 258 | Nature neuroscience | 2015 | hg19 | NA | Mapping DNA methylation across development, genotype and schizophrenia in the human frontal cortex |
|  | rs2895249 |  | PHF2  | 9 | 96362102  | 96362102  | 9.21E-12 | 103 | 26619357 | mQTL | Brain                   | EUR | 166 | Nature neuroscience | 2015 | hg19 | NA | Methylation QTLs in the developing brain and their enrichment in schizophrenia risk loci           |

|  |          |  |  |             |    |          |          |          |    |          |      |       |     |      |                        |      |      |    |                                                                                                 |
|--|----------|--|--|-------------|----|----------|----------|----------|----|----------|------|-------|-----|------|------------------------|------|------|----|-------------------------------------------------------------------------------------------------|
|  | rs547891 |  |  | MED19       | 11 | 5747186  | 57479795 | 9.07E-07 | 51 | 30329095 | sQTL | Brain | MIX | 514  | Nucleic acids research | 2019 | hg19 | NA | Cancer Splicing QTL: a database for genome-wide identification of splicing QTLs in human cancer |
|  | rs547891 |  |  | MED19       | 11 | 57479673 | 57479673 | 8.61E-11 | 70 | 30545857 | sQTL | Brain | MIX | 1866 | Science                | 2018 | hg19 | NA | Comprehensive functional genomic resource and integrative model for the human brain             |
|  | rs547891 |  |  | TMX2-CTNND1 | 11 | 57520715 | 57520715 | 5.46E-11 | 70 | 30545857 | sQTL | Brain | MIX | 1866 | Science                | 2018 | hg19 | NA | Comprehensive                                                                                   |

|  |             |  |        |    |          |          |          |    |          |      |       |     |      |         |      |      |    |                                                                                     |                                                                       |
|--|-------------|--|--------|----|----------|----------|----------|----|----------|------|-------|-----|------|---------|------|------|----|-------------------------------------------------------------------------------------|-----------------------------------------------------------------------|
|  |             |  |        |    |          |          |          |    |          |      |       |     |      |         |      |      |    |                                                                                     | functional genomic resource and integrative model for the human brain |
|  | rs560050580 |  | WNT3   | 17 | 44896126 | 44896126 | 2.96E-08 | 70 | 30545857 | sQTL | Brain | MIX | 1866 | Science | 2018 | hg19 | NA | Comprehensive functional genomic resource and integrative model for the human brain |                                                                       |
|  | rs560050580 |  | KANSL1 | 17 | 44123487 | 44123487 | 9.50E-15 | 70 | 30545857 | sQTL | Brain | MIX | 1866 | Science | 2018 | hg19 | NA | Comprehensive functional genomic resource and integrative model for the human brain |                                                                       |

|  |             |  |           |    |          |          |          |    |          |      |       |     |      |         |      |      |    |                                                                                     |
|--|-------------|--|-----------|----|----------|----------|----------|----|----------|------|-------|-----|------|---------|------|------|----|-------------------------------------------------------------------------------------|
|  |             |  |           |    |          |          |          |    |          |      |       |     |      |         |      |      |    | resource and integrative model for the human brain                                  |
|  | rs560050580 |  | KANSL1    | 17 | 44270942 | 44270942 | 1.22E-17 | 70 | 30545857 | sQTL | Brain | MIX | 1866 | Science | 2018 | hg19 | NA | Comprehensive functional genomic resource and integrative model for the human brain |
|  | rs560050580 |  | LRRC37A4P | 17 | 43623170 | 43623170 | 6.24E-10 | 70 | 30545857 | sQTL | Brain | MIX | 1866 | Science | 2018 | hg19 | NA | Comprehensive functional genomic resource and integrative                           |

|  |             |  |          |    |          |          |          |    |          |      |       |     |      |         |      |      |    |                                                                                     |
|--|-------------|--|----------|----|----------|----------|----------|----|----------|------|-------|-----|------|---------|------|------|----|-------------------------------------------------------------------------------------|
|  |             |  |          |    |          |          |          |    |          |      |       |     |      |         |      |      |    | model for the human brain                                                           |
|  | rs560050580 |  | PLEKH M1 | 17 | 43568110 | 43568110 | 1.60E-10 | 70 | 30545857 | sQTL | Brain | MIX | 1866 | Science | 2018 | hg19 | NA | Comprehensive functional genomic resource and integrative model for the human brain |
|  | rs560050580 |  | ARL17 B  | 17 | 44370099 | 44370099 | 1.41E-74 | 70 | 30545857 | sQTL | Brain | MIX | 1866 | Science | 2018 | hg19 | NA | Comprehensive functional genomic resource and integrative model for the human brain |

|  |             |  |                 |    |          |          |          |    |          |      |       |     |      |         |      |      |    |                                                                                     |
|--|-------------|--|-----------------|----|----------|----------|----------|----|----------|------|-------|-----|------|---------|------|------|----|-------------------------------------------------------------------------------------|
|  | rs560050580 |  | ARL17B          | 17 | 44439130 | 44439130 | 7.41E-07 | 70 | 30545857 | sQTL | Brain | MIX | 1866 | Science | 2018 | hg19 | NA | Comprehensive functional genomic resource and integrative model for the human brain |
|  | rs560050580 |  | LINC02210-CRHR1 | 17 | 43861673 | 43861673 | 1.58E-11 | 70 | 30545857 | sQTL | Brain | MIX | 1866 | Science | 2018 | hg19 | NA | Comprehensive functional genomic resource and integrative model for the human brain |
|  | rs560050580 |  | NULL            | 17 | 43663237 | 43663237 | 5.86E-07 | 70 | 30545857 | sQTL | Brain | MIX | 1866 | Science | 2018 | hg19 | NA | Comprehensive functio                                                               |

|  |             |  |      |    |          |          |          |    |          |      |       |     |      |         |      |      |    |                                                                                     |
|--|-------------|--|------|----|----------|----------|----------|----|----------|------|-------|-----|------|---------|------|------|----|-------------------------------------------------------------------------------------|
|  |             |  |      |    |          |          |          |    |          |      |       |     |      |         |      |      |    | nal genomic resource and integrative model for the human brain                      |
|  | rs560050580 |  | NULL | 17 | 43679706 | 43679706 | 9.89E-24 | 70 | 30545857 | sQTL | Brain | MIX | 1866 | Science | 2018 | hg19 | NA | Comprehensive functional genomic resource and integrative model for the human brain |
|  | rs560050580 |  | NULL | 17 | 43697694 | 43697694 | 1.66E-45 | 70 | 30545857 | sQTL | Brain | MIX | 1866 | Science | 2018 | hg19 | NA | Comprehensive functional genomic resource                                           |

|  |             |  |      |    |          |          |          |    |          |      |       |     |      |         |      |      |    |                                                                                     |
|--|-------------|--|------|----|----------|----------|----------|----|----------|------|-------|-----|------|---------|------|------|----|-------------------------------------------------------------------------------------|
|  |             |  |      |    |          |          |          |    |          |      |       |     |      |         |      |      |    | e and integrative model for the human brain                                         |
|  | rs560050580 |  | NULL | 17 | 44320972 | 44320972 | 9.55E-10 | 70 | 30545857 | sQTL | Brain | MIX | 1866 | Science | 2018 | hg19 | NA | Comprehensive functional genomic resource and integrative model for the human brain |
|  | rs560050580 |  | NULL | 17 | 44337972 | 44337972 | 8.07E-28 | 70 | 30545857 | sQTL | Brain | MIX | 1866 | Science | 2018 | hg19 | NA | Comprehensive functional genomic resource and integrative model                     |



|  |             |  |      |    |          |          |          |    |          |      |       |     |      |         |      |      |    |                                                                                     |
|--|-------------|--|------|----|----------|----------|----------|----|----------|------|-------|-----|------|---------|------|------|----|-------------------------------------------------------------------------------------|
|  |             |  |      |    |          |          |          |    |          |      |       |     |      |         |      |      |    | for the human brain                                                                 |
|  | rs560050580 |  | NULL | 17 | 44344403 | 44344403 | 1.28E-13 | 70 | 30545857 | sQTL | Brain | MIX | 1866 | Science | 2018 | hg19 | NA | Comprehensive functional genomic resource and integrative model for the human brain |
|  | rs560050580 |  | NULL | 17 | 44588877 | 44588877 | 4.27E-27 | 70 | 30545857 | sQTL | Brain | MIX | 1866 | Science | 2018 | hg19 | NA | Comprehensive functional genomic resource and integrative model for the human brain |

|  |           |  |       |    |           |           |          |    |          |      |       |     |      |                        |      |      |    |                                                                                                |
|--|-----------|--|-------|----|-----------|-----------|----------|----|----------|------|-------|-----|------|------------------------|------|------|----|------------------------------------------------------------------------------------------------|
|  | rs4788878 |  | GGA3  | 17 | 73232694  | 73258444  | 1.83E-09 | 51 | 30329095 | sQTL | Brain | MIX | 514  | Nucleic acids research | 2019 | hg19 | NA | Cancer SplicingQTL: a database for genome-wide identification of splicing QTLs in human cancer |
|  | rs4788878 |  | NUP85 | 17 | 73201754  | 73231853  | 1.39E-20 | 51 | 30329095 | sQTL | Brain | MIX | 514  | Nucleic acids research | 2019 | hg19 | NA | Cancer SplicingQTL: a database for genome-wide identification of splicing QTLs in human cancer |
|  | rs6964432 |  | NULL  | 7  | 133812052 | 133812052 | 6.17E-07 | 70 | 30545857 | sQTL | Brain | MIX | 1866 | Science                | 2018 | hg19 | NA | Comprehensive function                                                                         |

|  |           |  |           |   |          |          |          |    |          |      |       |     |      |         |      |      |    |                                                                                     |
|--|-----------|--|-----------|---|----------|----------|----------|----|----------|------|-------|-----|------|---------|------|------|----|-------------------------------------------------------------------------------------|
|  |           |  |           |   |          |          |          |    |          |      |       |     |      |         |      |      |    | nal genomic resource and integrative model for the human brain                      |
|  | rs2895249 |  | FAM120AOS | 9 | 96213806 | 96213806 | 2.36E-09 | 70 | 30545857 | sQTL | Brain | MIX | 1866 | Science | 2018 | hg19 | NA | Comprehensive functional genomic resource and integrative model for the human brain |

## Table 2: Colocalization analysis for genes that were significant for brain-tissue TWAS of PCL-total

The colocalization analysis using coloc R package was performed to obtain shared causal loci posterior probability of H4 hypothesis (i.e. both traits -PCL-17 and tissue specific QTLs are associated and share a single causal variant). The table shows the H4 probability for 13 brain tissues from the GTEx v8. The genes that were not found in the tissue are greyed.

|                      | Amygdala | Anterior cingulate cortex BA24 | Caudate basal ganglia | Cerebellar Hemisphere | Cerebellum | Cortex | Frontal Cortex BA9 | Hippocampus | Hypothalamus | Nucleus accumbens basal ganglia | Putamen basal ganglia | Spinal cord cervical c-1 | Substantia nigra |
|----------------------|----------|--------------------------------|-----------------------|-----------------------|------------|--------|--------------------|-------------|--------------|---------------------------------|-----------------------|--------------------------|------------------|
| <i>AMT</i>           | 17%      | 0%                             | 0%                    | 0%                    | 0%         | 0%     | 0%                 | 0%          | 3%           | 0%                              |                       |                          |                  |
| <i>RNF123</i>        | 90%      | 89%                            | 51%                   | 92%                   | 92%        | 91%    | 87%                | 55%         | 90%          | 92%                             |                       |                          |                  |
| <i>FAM212A</i>       | 5%       | 7%                             | 10%                   | 92%                   | 92%        | 10%    | 8%                 | 12%         | 6%           | 47%                             | 10%                   | 5%                       | 7%               |
| <i>MST1R</i>         | 8%       | 70%                            | 91%                   | 79%                   | 74%        | 84%    | 37%                | 27%         | 44%          | 70%                             |                       |                          |                  |
| <i>RBM6</i>          | 56%      | 76%                            | 76%                   | 72%                   | 63%        | 64%    | 73%                | 66%         | 67%          | 64%                             |                       |                          |                  |
| <i>FMNL1</i>         | 8%       | 5%                             | 6%                    | 68%                   | 71%        | 5%     | 11%                | 6%          | 8%           | 8%                              |                       |                          |                  |
| <i>ARHGAP27</i>      | 5%       | 7%                             | 72%                   | 64%                   | 77%        | 89%    | 26%                | 10%         | 17%          | 70%                             |                       |                          |                  |
| <i>PLEKHM1</i>       | 89%      | 89%                            | 90%                   | 67%                   | 70%        | 91%    | 88%                | 72%         | 56%          | 90%                             |                       |                          |                  |
| <i>RP11-798G7.8</i>  | 28%      | 35%                            | 10%                   | 64%                   | 71%        | 54%    | 19%                | 15%         | 9%           | 6%                              | 21%                   | 6%                       | 7%               |
| <i>RP11-798G7.6</i>  | 7%       | 8%                             | 5%                    | 1%                    | 37%        | 17%    |                    | 7%          | 11%          | 6%                              | 15%                   | 6%                       | 6%               |
| <i>LRRC37A4P</i>     | 69%      | 70%                            | 70%                   | 70%                   | 70%        | 70%    | 70%                | 70%         | 70%          | 70%                             |                       |                          |                  |
| <i>DND1P1</i>        | 70%      | 69%                            | 69%                   | 60%                   | 70%        | 70%    | 66%                | 70%         | 70%          | 70%                             | 70%                   | 68%                      | 68%              |
| <i>RP11-707O23.5</i> | 70%      | 70%                            | 69%                   | 69%                   | 70%        | 70%    | 69%                | 70%         | 70%          | 71%                             | 70%                   | 69%                      | 69%              |
| <i>CRHR1-IT1</i>     | 69%      | 69%                            | 70%                   | 74%                   | 76%        | 69%    | 70%                | 70%         | 70%          | 70%                             |                       |                          |                  |
| <i>CRHR1</i>         | 17%      | 5%                             | 51%                   | 9%                    | 6%         | 24%    | 35%                | 85%         | 10%          | 62%                             |                       |                          |                  |
| <i>SPPL2C</i>        | 5%       | 11%                            | 9%                    | 62%                   | 66%        | 39%    | 81%                | 6%          | 7%           | 8%                              |                       |                          |                  |
| <i>MAPT</i>          | 7%       | 11%                            | 35%                   | 16%                   | 51%        | 6%     | 13%                | 9%          | 6%           | 5%                              |                       |                          |                  |
| <i>RP11-259G18.2</i> | 40%      | 33%                            | 5%                    | 65%                   | 66%        | 69%    | 20%                | 24%         | 6%           | 9%                              | 47%                   | 56%                      | 67%              |
| <i>RP11-259G18.3</i> | 26%      | 5%                             | 50%                   | 43%                   | 70%        | 28%    | 6%                 | 6%          | 13%          | 9%                              | 40%                   | 43%                      | 12%              |
| <i>RP11-259G18.1</i> | 69%      | 42%                            | 65%                   | 70%                   | 70%        | 74%    | 60%                | 64%         | 48%          | 68%                             | 54%                   | 34%                      | 58%              |
| <i>LRRC37A2</i>      | 96%      | 98%                            | 98%                   | 97%                   | 98%        | 96%    | 96%                | 98%         | 97%          | 98%                             |                       |                          |                  |
| <i>ARL17A</i>        | 96%      | 93%                            | 96%                   | 96%                   | 97%        | 97%    | 97%                | 97%         | 94%          | 97%                             |                       |                          |                  |

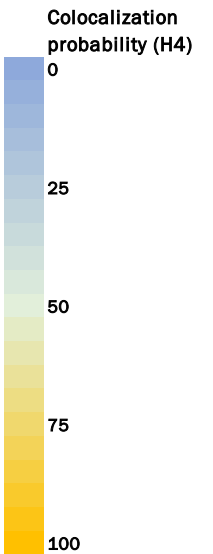

Supplement: NIHMS1655478-supplement-1655478_SuppData2.pdf [file NIHMS1655478-supplement-1655478_SuppData2.pdf]
