# Supplementary material
Source: PubMed Central journal article supplement (PMC7972521)
Supplement: NIHMS1655478-supplement-1655478_SuppData1.pdf [file NIHMS1655478-supplement-1655478_SuppData1.pdf]

## Supplementary 8UJ1

Genomic Characterization of Posttraumatic Stress Disorder and its Symptom Subdomains in the Million Veteran Program

# Fine mapping of risk loci for D7@HchU and EHR-binary

## Contents

---

|                                                                    |    |
|--------------------------------------------------------------------|----|
| Figure 1: Summary of risk loci for Total PCL (EUR population)..... | 2  |
| chr2:22430795-22546631.....                                        | 3  |
| chr3:18611283-18824298.....                                        | 4  |
| chr3:49734229-50176259.....                                        | 5  |
| chr5:107346393-107769562.....                                      | 6  |
| chr5:140222641-140346468.....                                      | 7  |
| chr7:1847623-2110850.....                                          | 8  |
| chr8:143309504-143340566.....                                      | 9  |
| chr9:140241209-140278206.....                                      | 10 |
| chr11:133531999-133561399.....                                     | 11 |
| chr17:42785473-44865603.....                                       | 12 |
| chr18:53190188-53393895.....                                       | 13 |
| chr19:18669987-18730695.....                                       | 14 |
| Figure 2: Summary of risk loci for EHR-binary.....                 | 15 |
| chr7:1847623-1892529 (EUR).....                                    | 16 |
| chr7:70217631-70234438 (EUR).....                                  | 17 |
| chr11:28591168-28710118 (EUR).....                                 | 18 |
| chr3:1256096-1261532 (AFR).....                                    | 19 |
| chr20:6724577-6724577 (AFR).....                                   | 20 |

### LEGEND NOTE:

Supplementary Data 1: ALL Figures [top panel]

The top panel shows regional association based on regression analysis of SNPs and PCL phenotype in the locus. The y-axis is  $-\log_{10}$  of two-sided p-values for each SNP, wherein the p-value lower than  $5 \times 10^{-8}$  represents Bonferroni-threshold for multiple testing ( $0.05/k \text{ SNPs} = p < 5 \times 10^{-8}$ )

Figure 1: Summary of risk loci for Total PCL (EUR population)

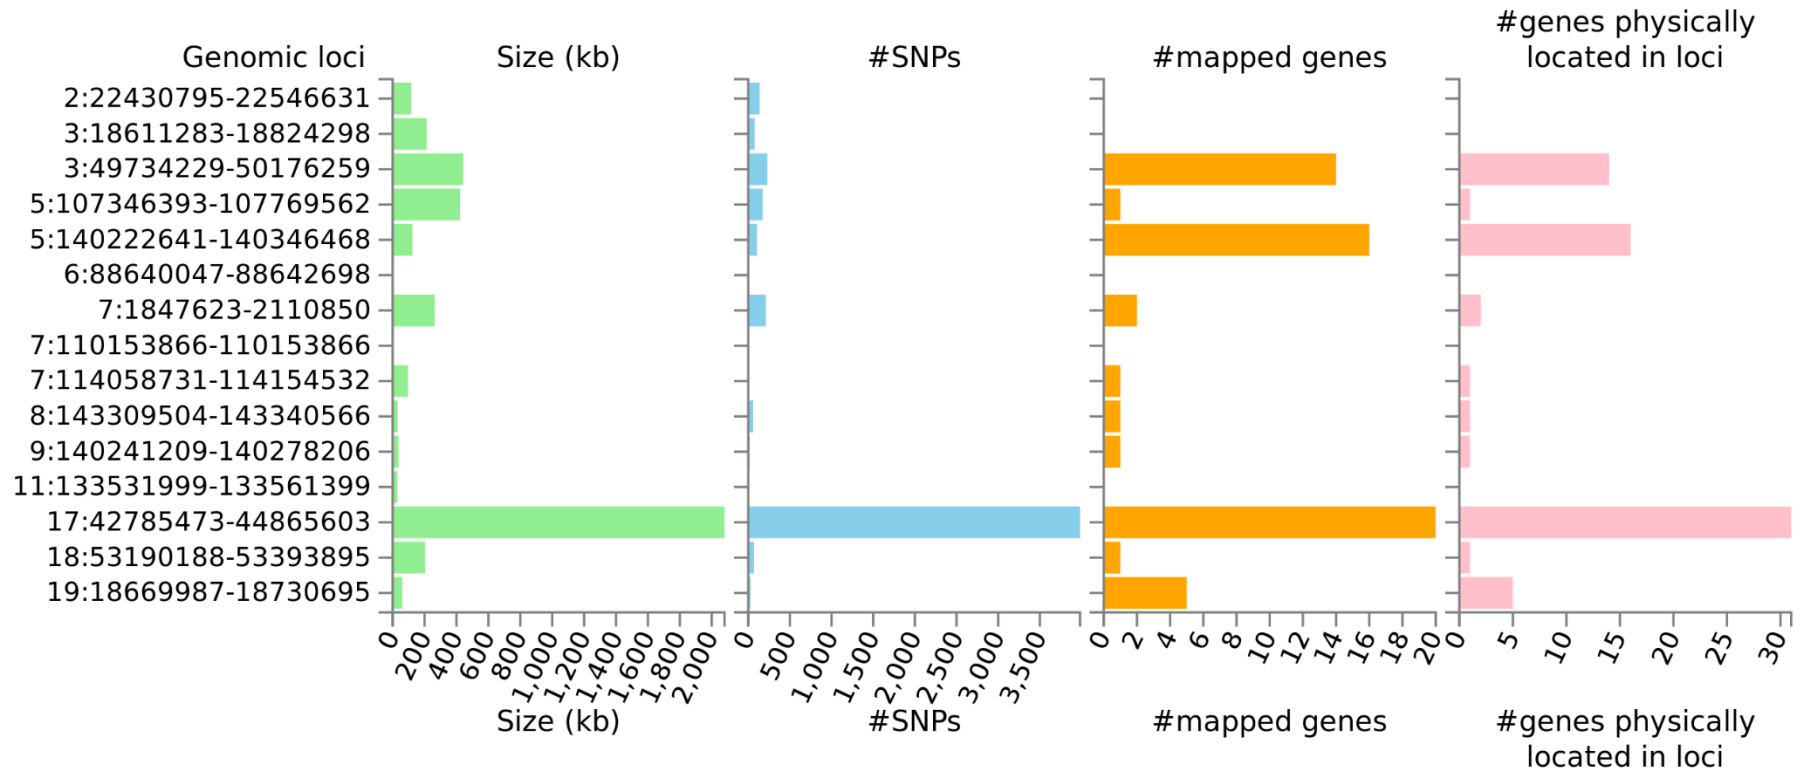

# chr2:22430795-22546631

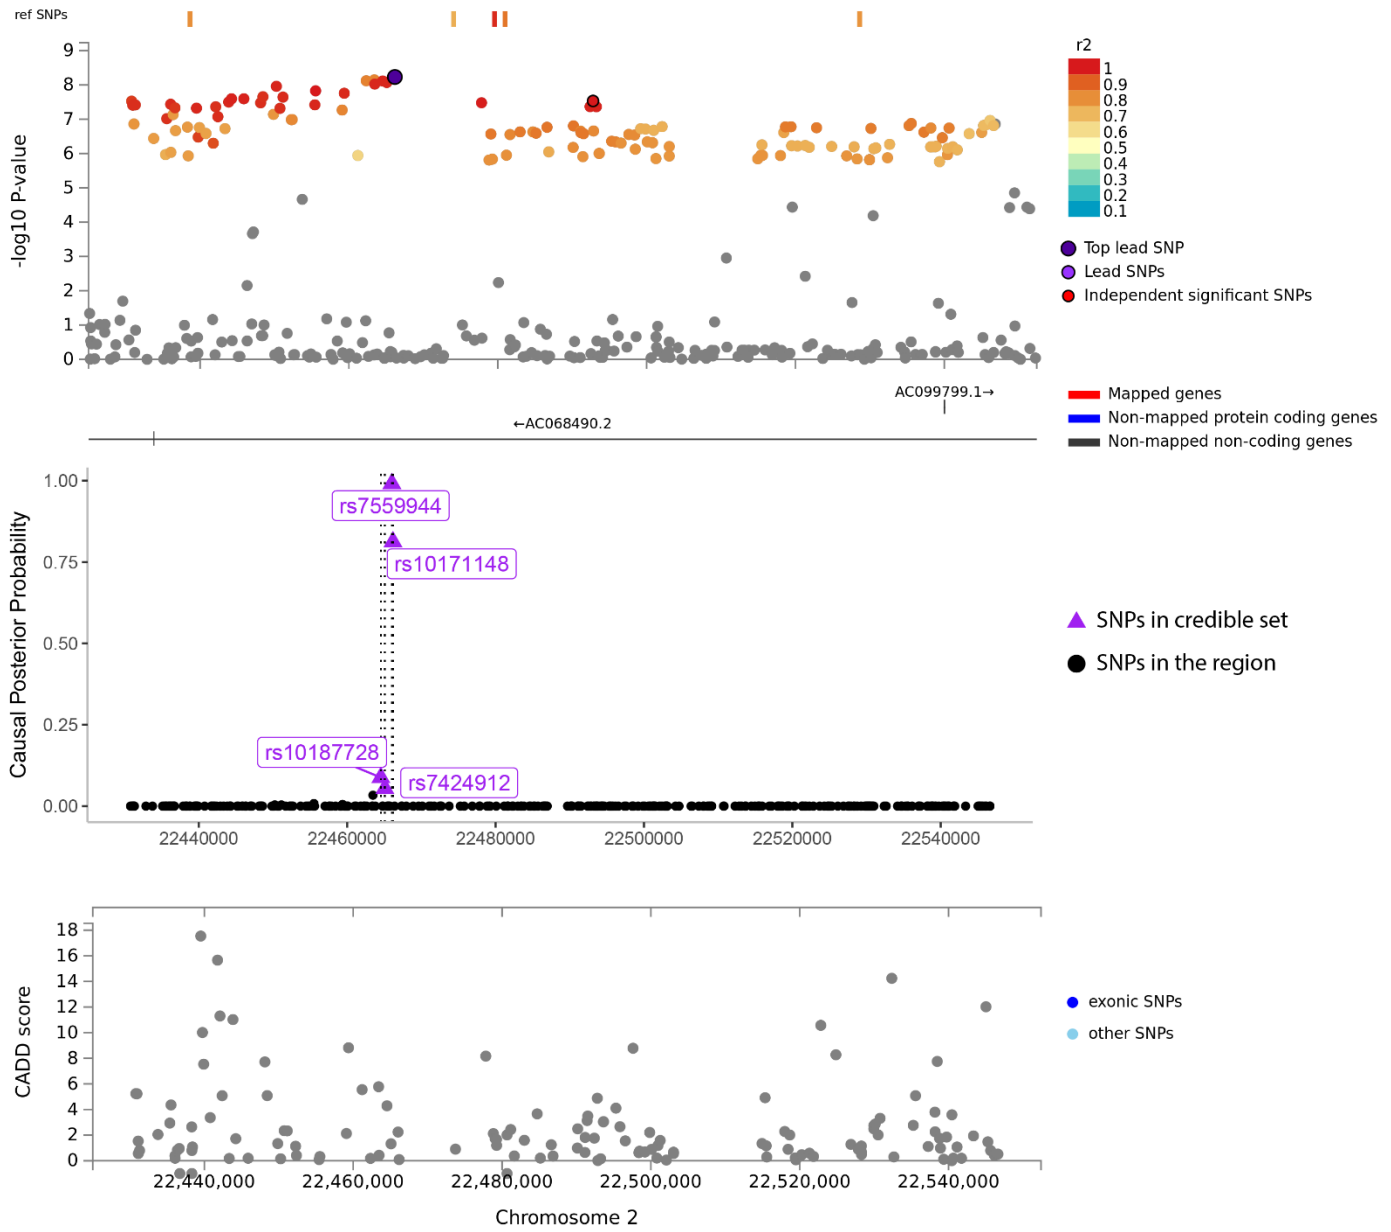

Figure 2: Fine mapping of the risk loci identified from FUMA.

The top panel shows regional association of SNPs in the locus. The y-axis is  $-\log_{10}$  of p-values for each SNP.

The middle panel finemaps all the SNPs in the region using CAVIAR where SNPs labelled and marked as triangles were identified as credible set. The y-axis is posterior probability of SNPs.

The bottom panel shows the CADD score (y-axis) for the SNPs in the region. The x-axis in all panels represents genomic location (base pair) of the locus.

# chr3:18611283-18824298

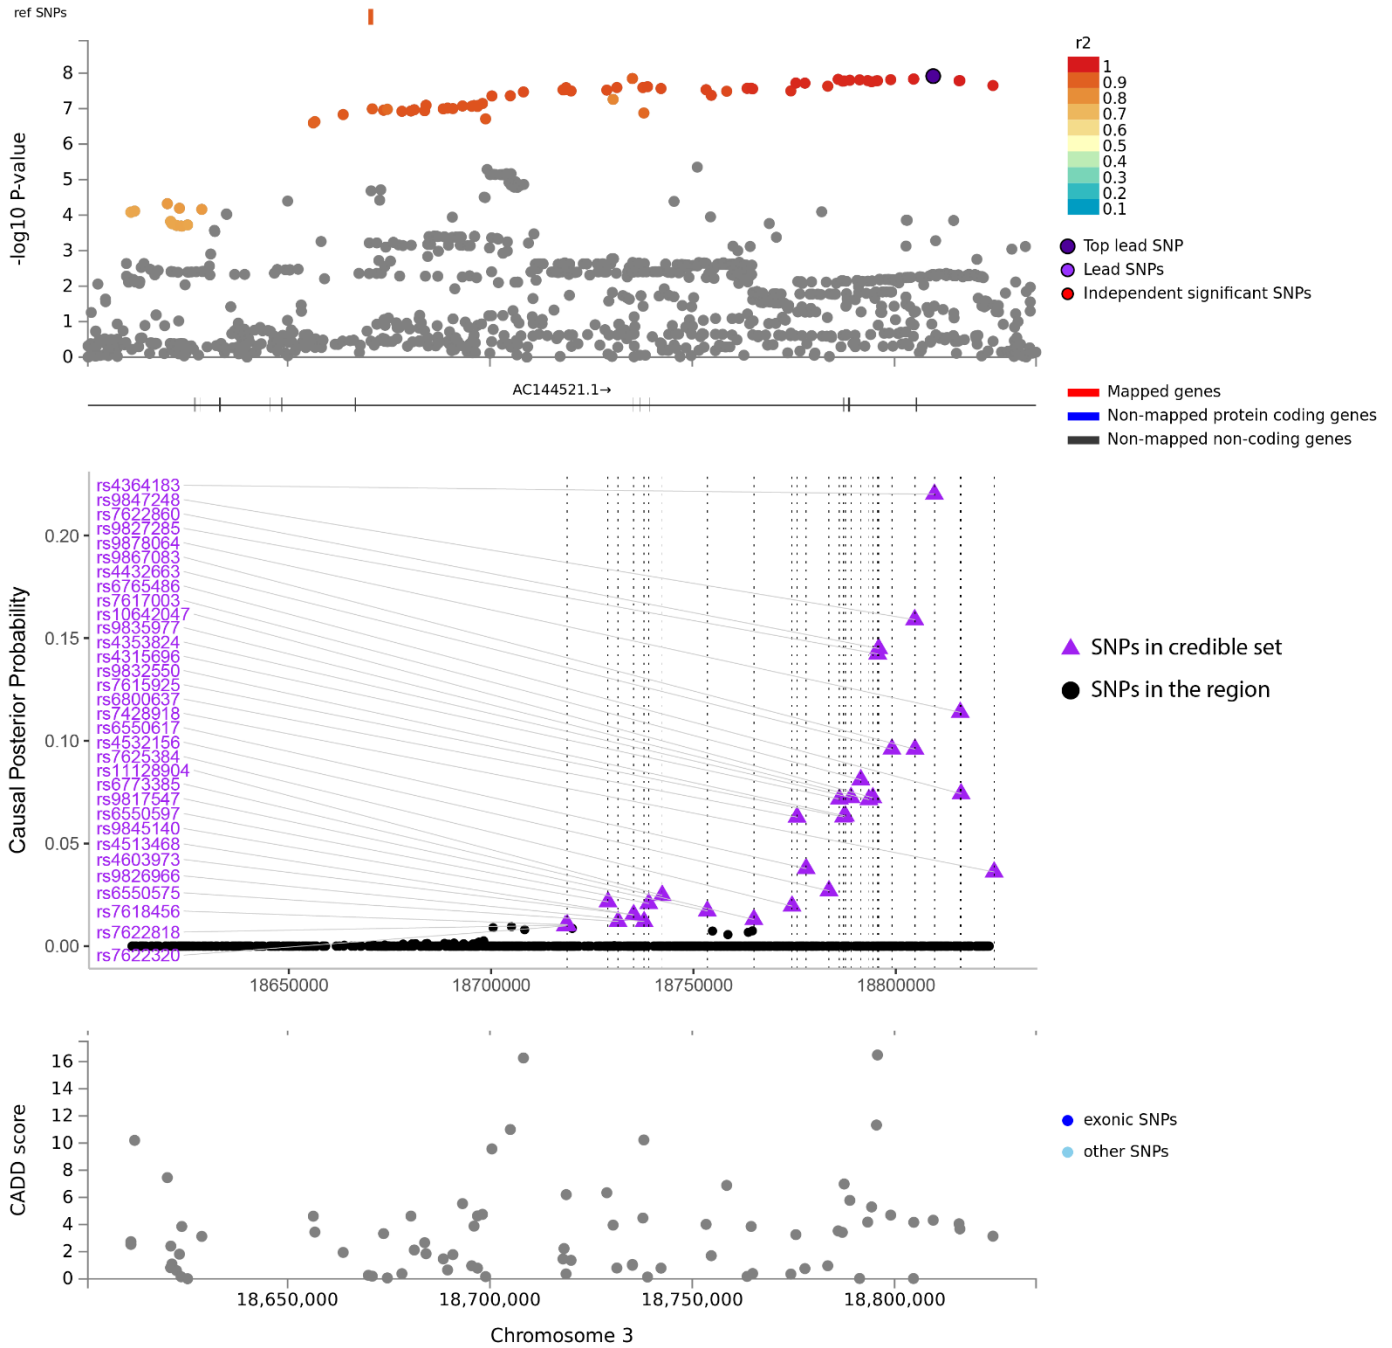

Figure 3: Fine mapping of the risk loci identified from FUMA.

The top panel shows regional association of SNPs in the locus. The y-axis is  $-\log_{10}$  of p-values for each SNP.

The middle panel finemaps all the SNPs in the region using CAVIAR where SNPs labelled and marked as triangles were identified as credible set. The y-axis is posterior probability of SNPs.

The bottom panel shows the CADD score (y-axis) for the SNPs in the region. The x-axis in all panels represents genomic location (base pair) of the locus.

# chr3:49734229-50176259

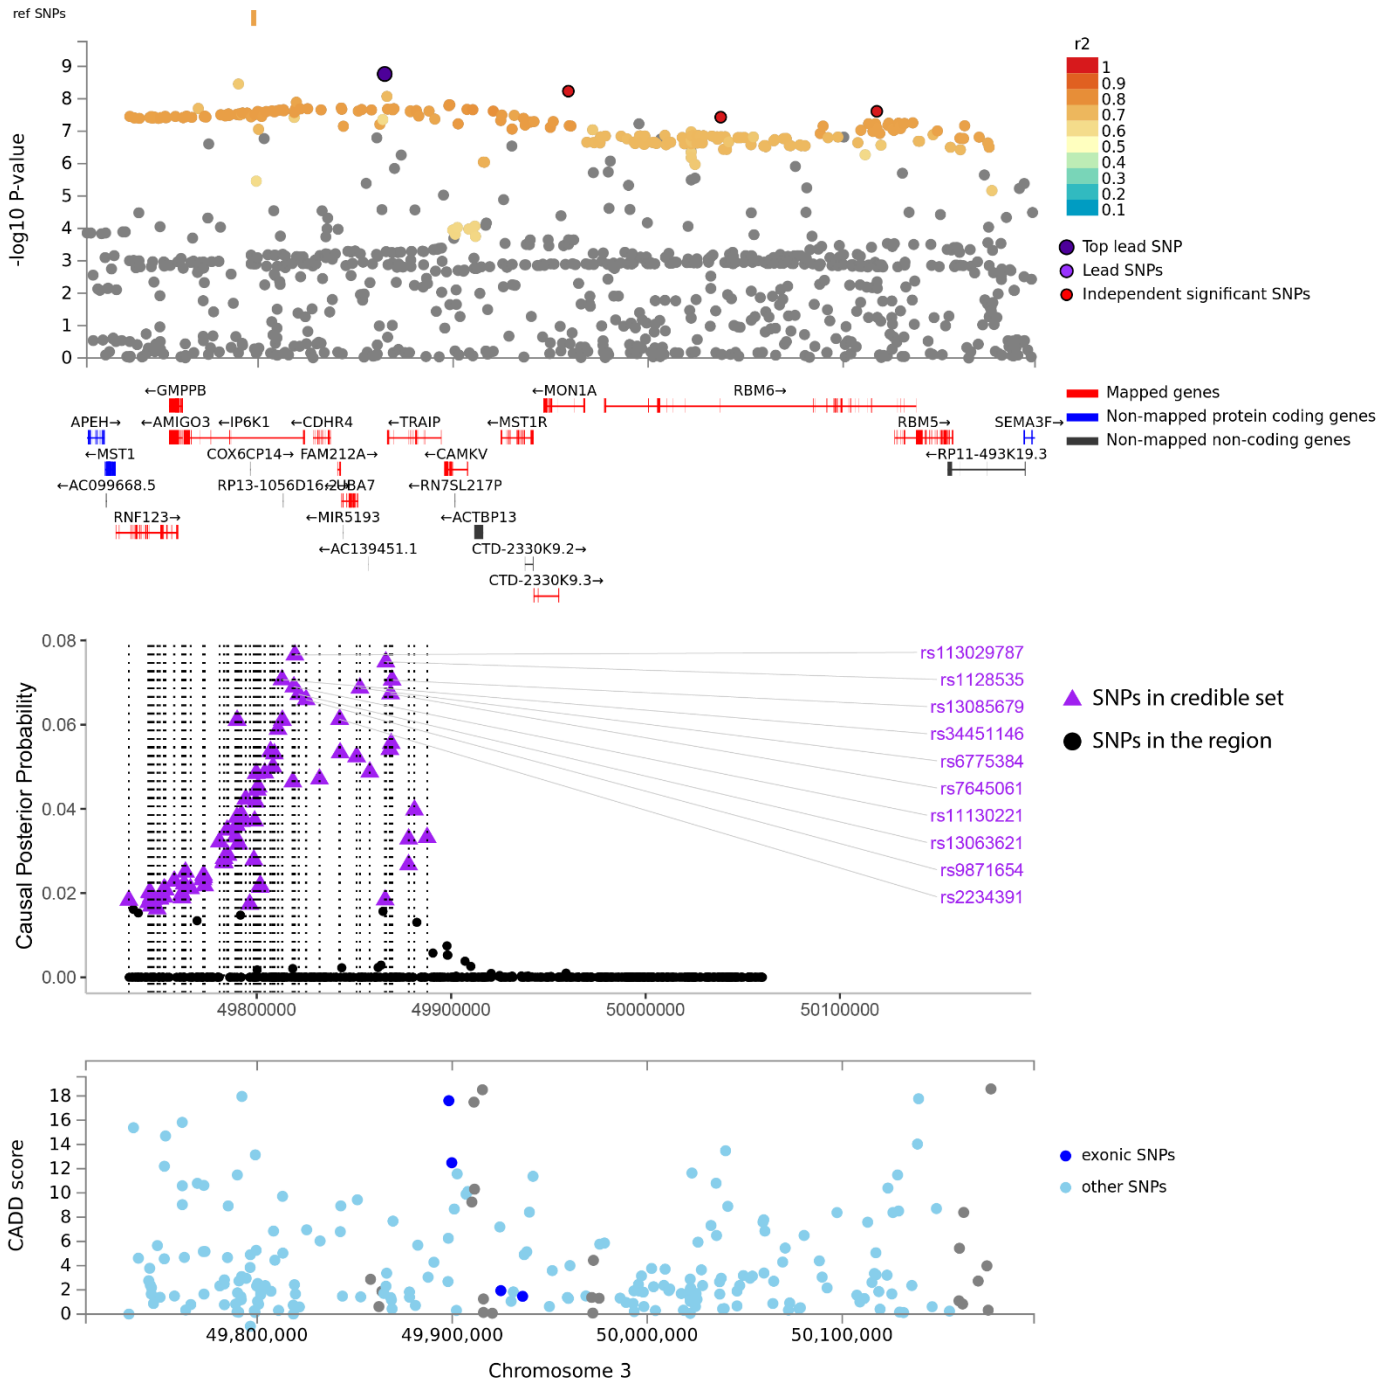

**Figure 4: Fine mapping of the risk loci identified from FUMA.**

The top panel shows regional association of SNPs in the locus. The y-axis is  $-\log_{10}$  of p-values for each SNP.

The middle panel finemaps all the SNPs in the region using CAVIAR where SNPs labelled and marked as triangles were identified as credible set. The y-axis is posterior probability of SNPs.

The bottom panel shows the CADD score (y-axis) for the SNPs in the region. The x-axis in all panels represents genomic location (base pair) of the locus.

# chr5:107346393-107769562

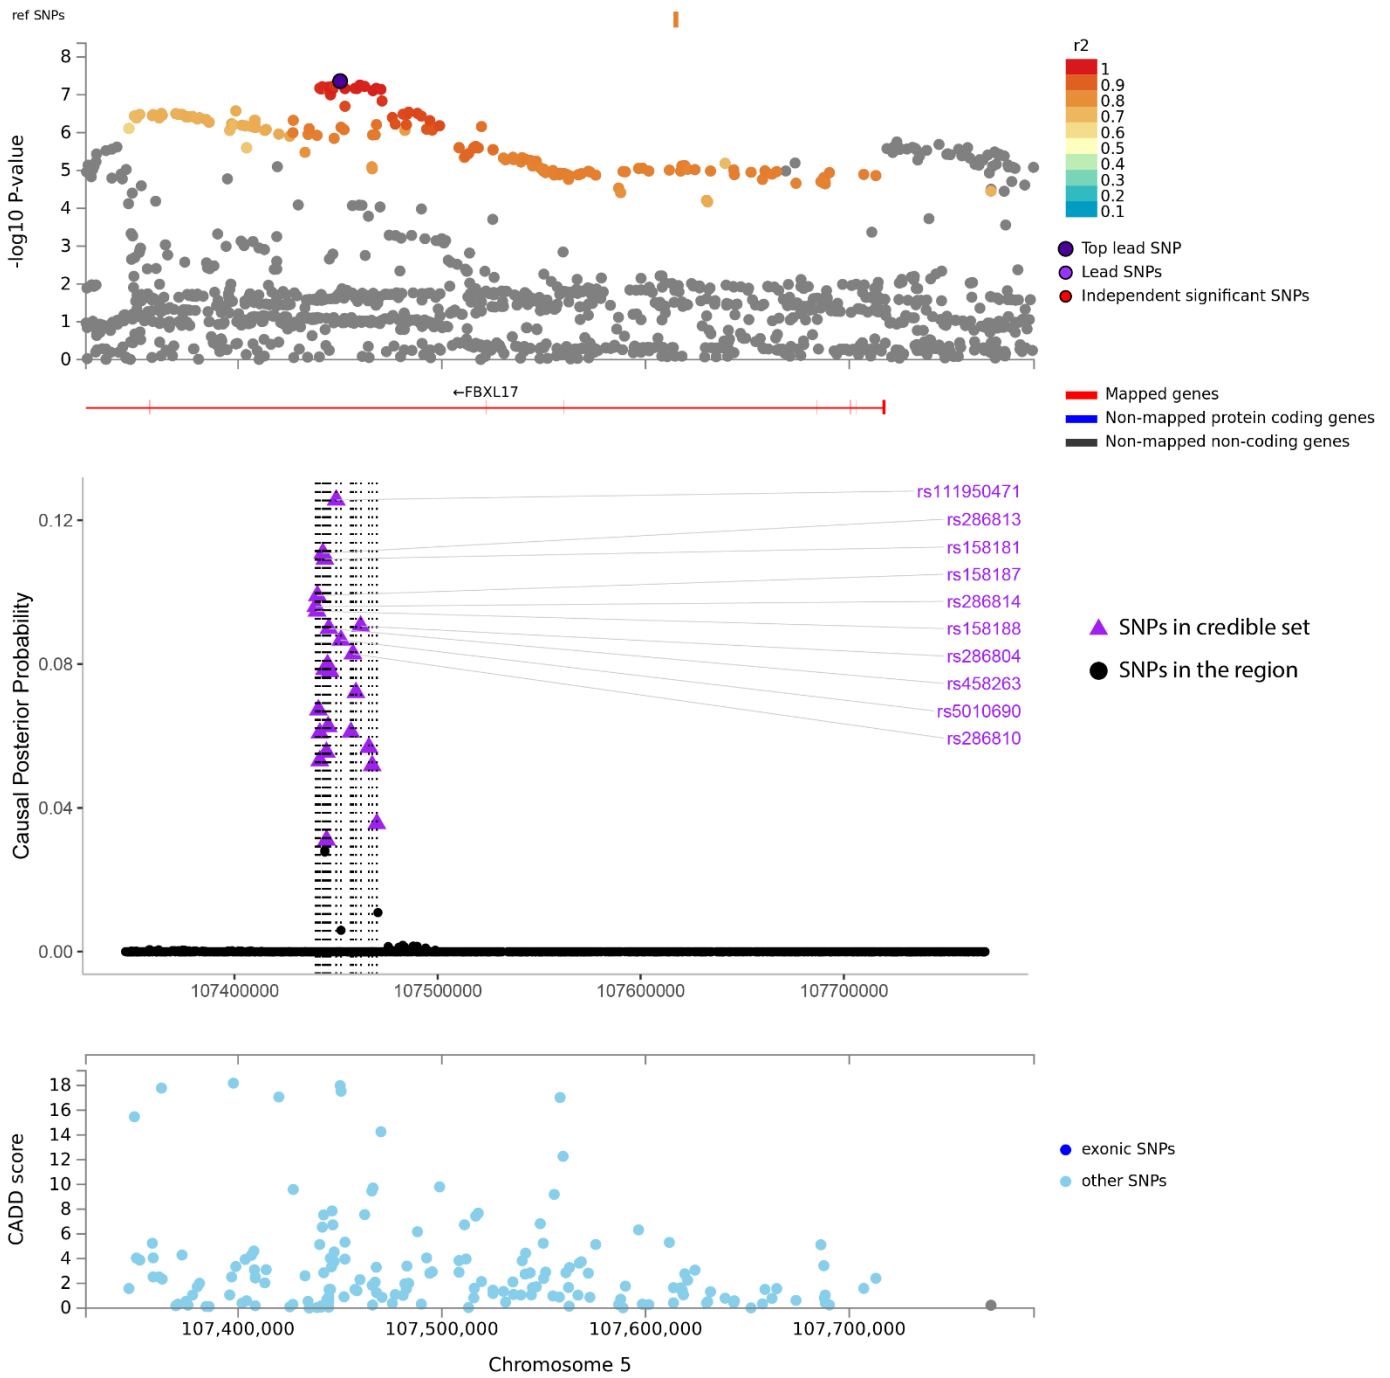

Figure 5: Fine mapping of the risk loci identified from FUMA.

The top panel shows regional association of SNPs in the locus. The y-axis is  $-\log_{10}$  of p-values for each SNP.

The middle panel finemaps all the SNPs in the region using CAVIAR where SNPs labelled and marked as triangles were identified as credible set. The y-axis is posterior probability of SNPs.

The bottom panel shows the CADD score (y-axis) for the SNPs in the region. The x-axis in all panels represents genomic location (base pair) of the locus.

# chr5:140222641-140346468

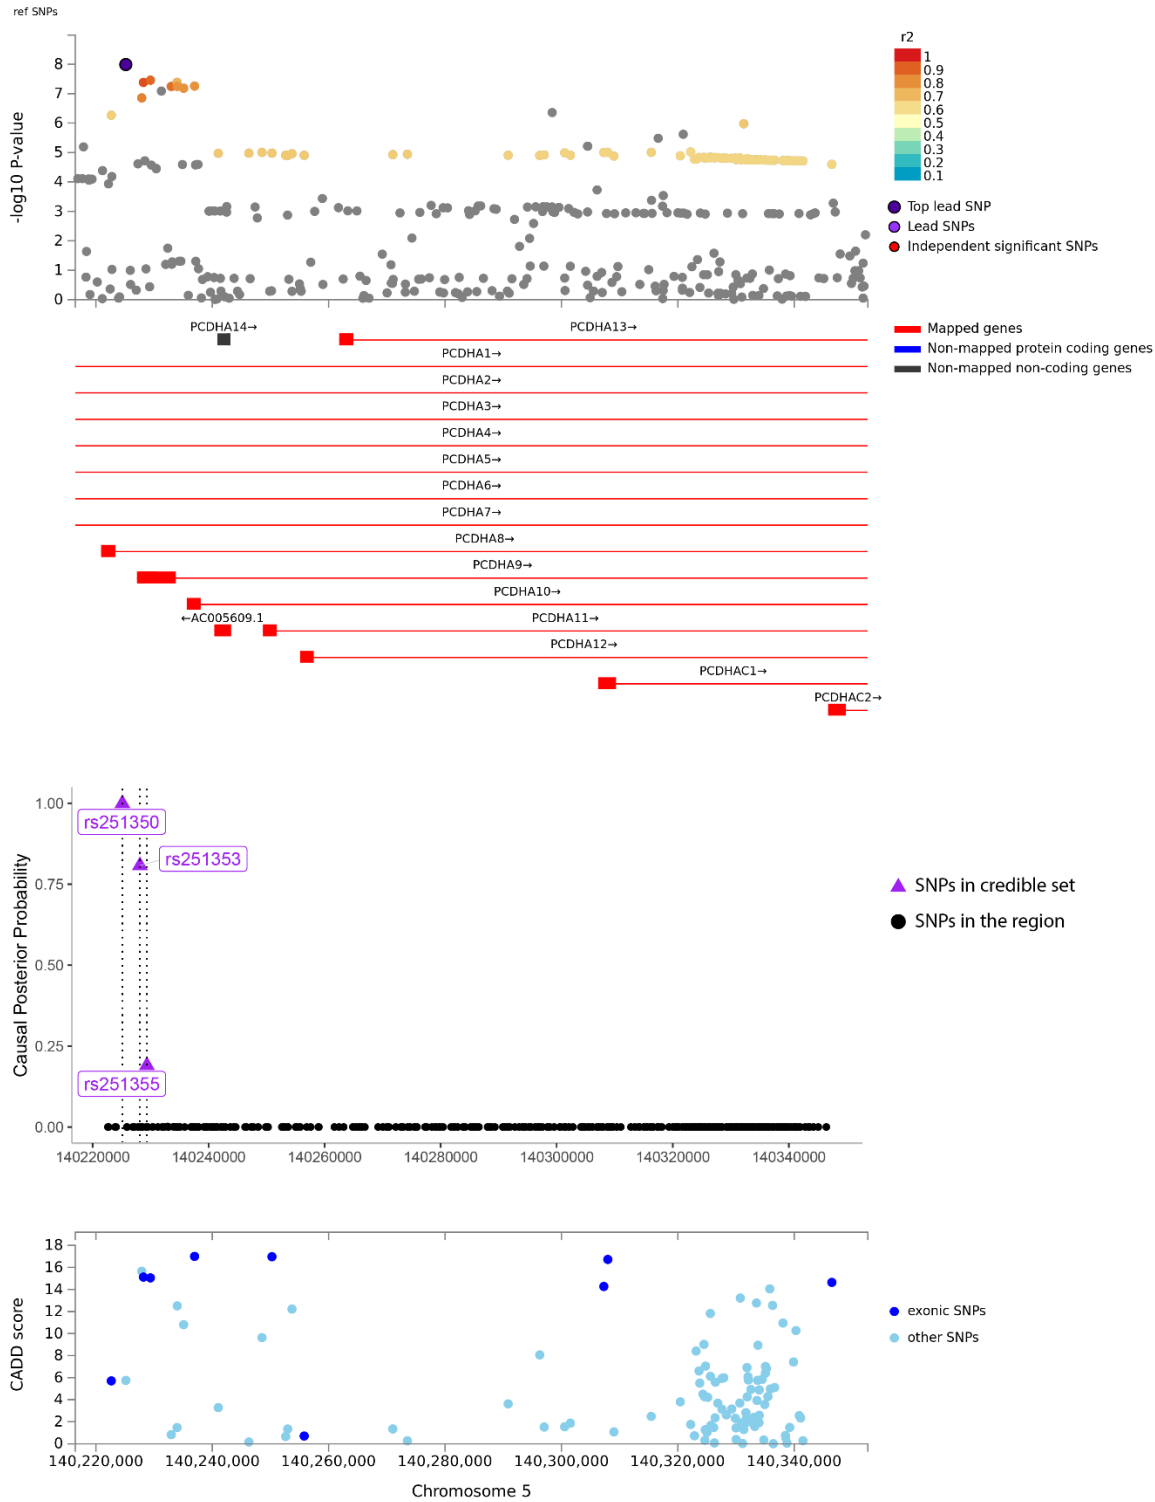

Figure 6: Fine mapping of the risk loci identified from FUMA.

The top panel shows regional association of SNPs in the locus. The y-axis is  $-\log_{10}$  of p-values for each SNP.

The middle panel finemaps all the SNPs in the region using CAVIAR where SNPs labelled and marked as triangles were identified as credible set. The y-axis is posterior probability of SNPs.

The bottom panel shows the CADD score (y-axis) for the SNPs in the region. The x-axis in all panels represents genomic location (base pair) of the locus.

# chr7:1847623-2110850

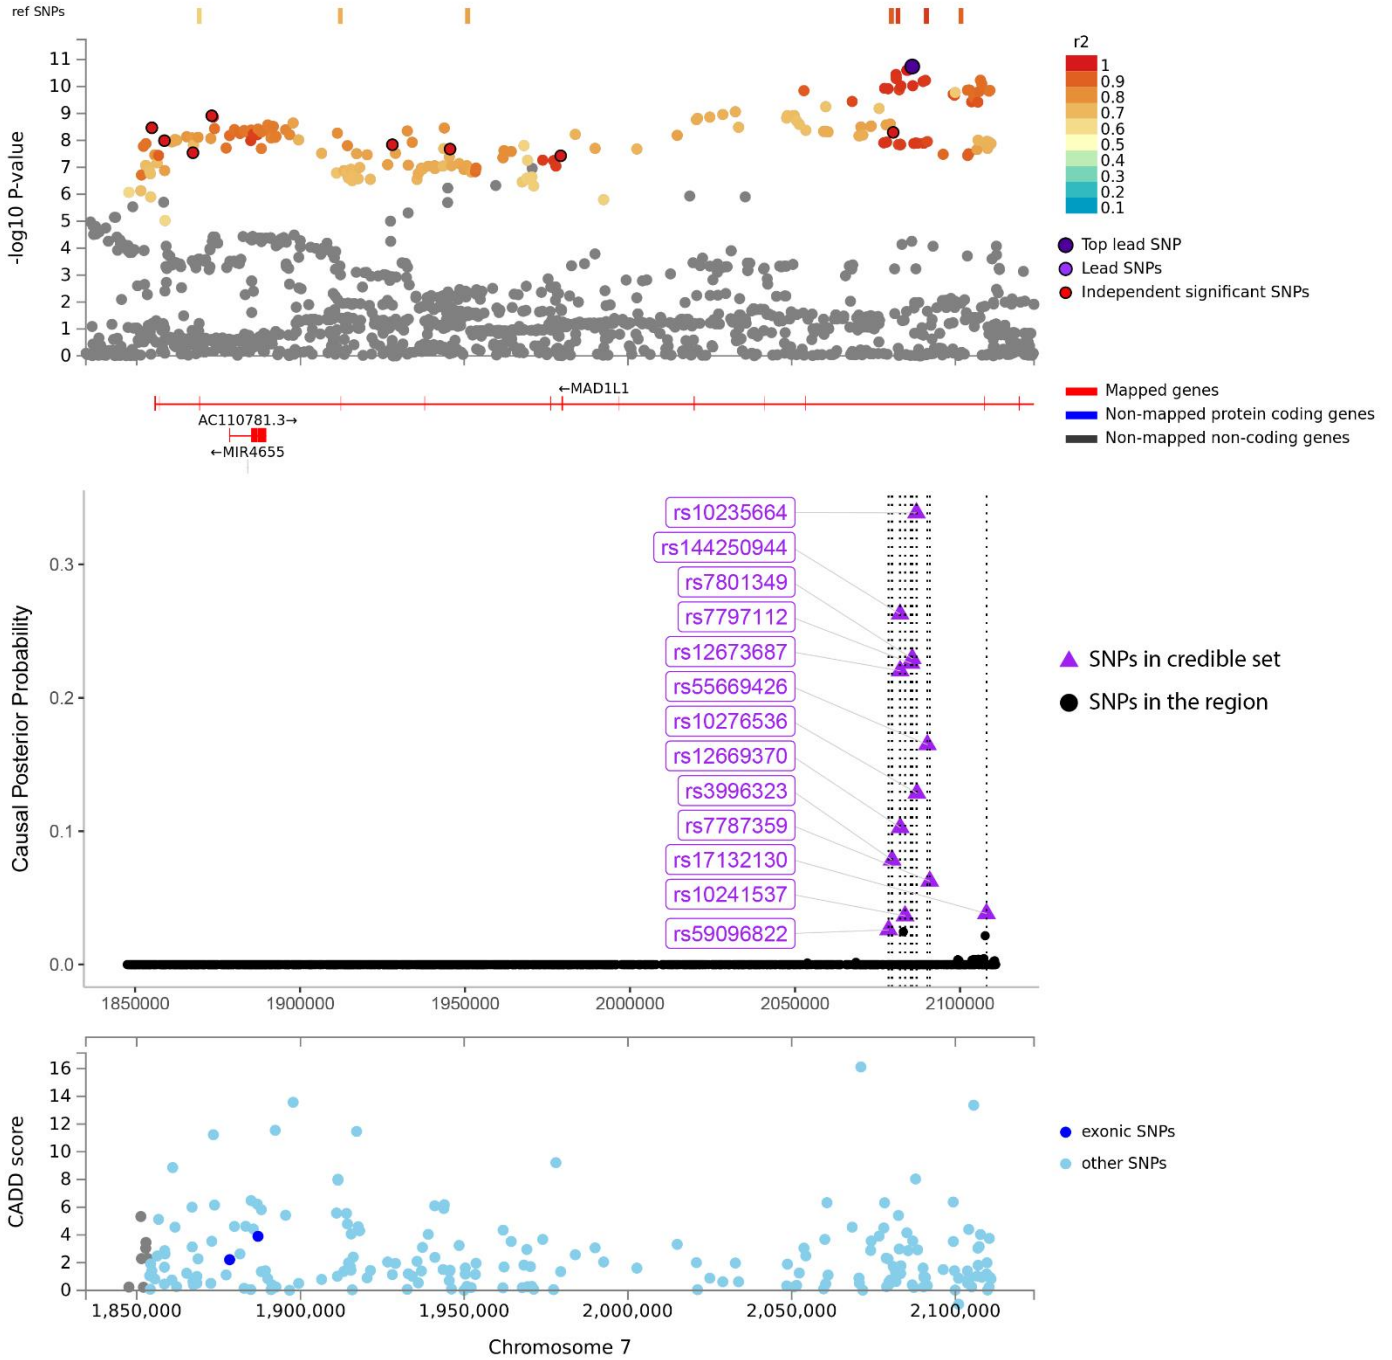

Figure 7: Fine mapping of the risk loci identified from FUMA.

The top panel shows regional association of SNPs in the locus. The y-axis is  $-\log_{10}$  of p-values for each SNP.

The middle panel finemaps all the SNPs in the region using CAVIAR where SNPs labelled and marked as triangles were identified as credible set. The y-axis is posterior probability of SNPs.

The bottom panel shows the CADD score (y-axis) for the SNPs in the region. The x-axis in all panels represents genomic location (base pair) of the locus.



# chr8:143309504-143340566

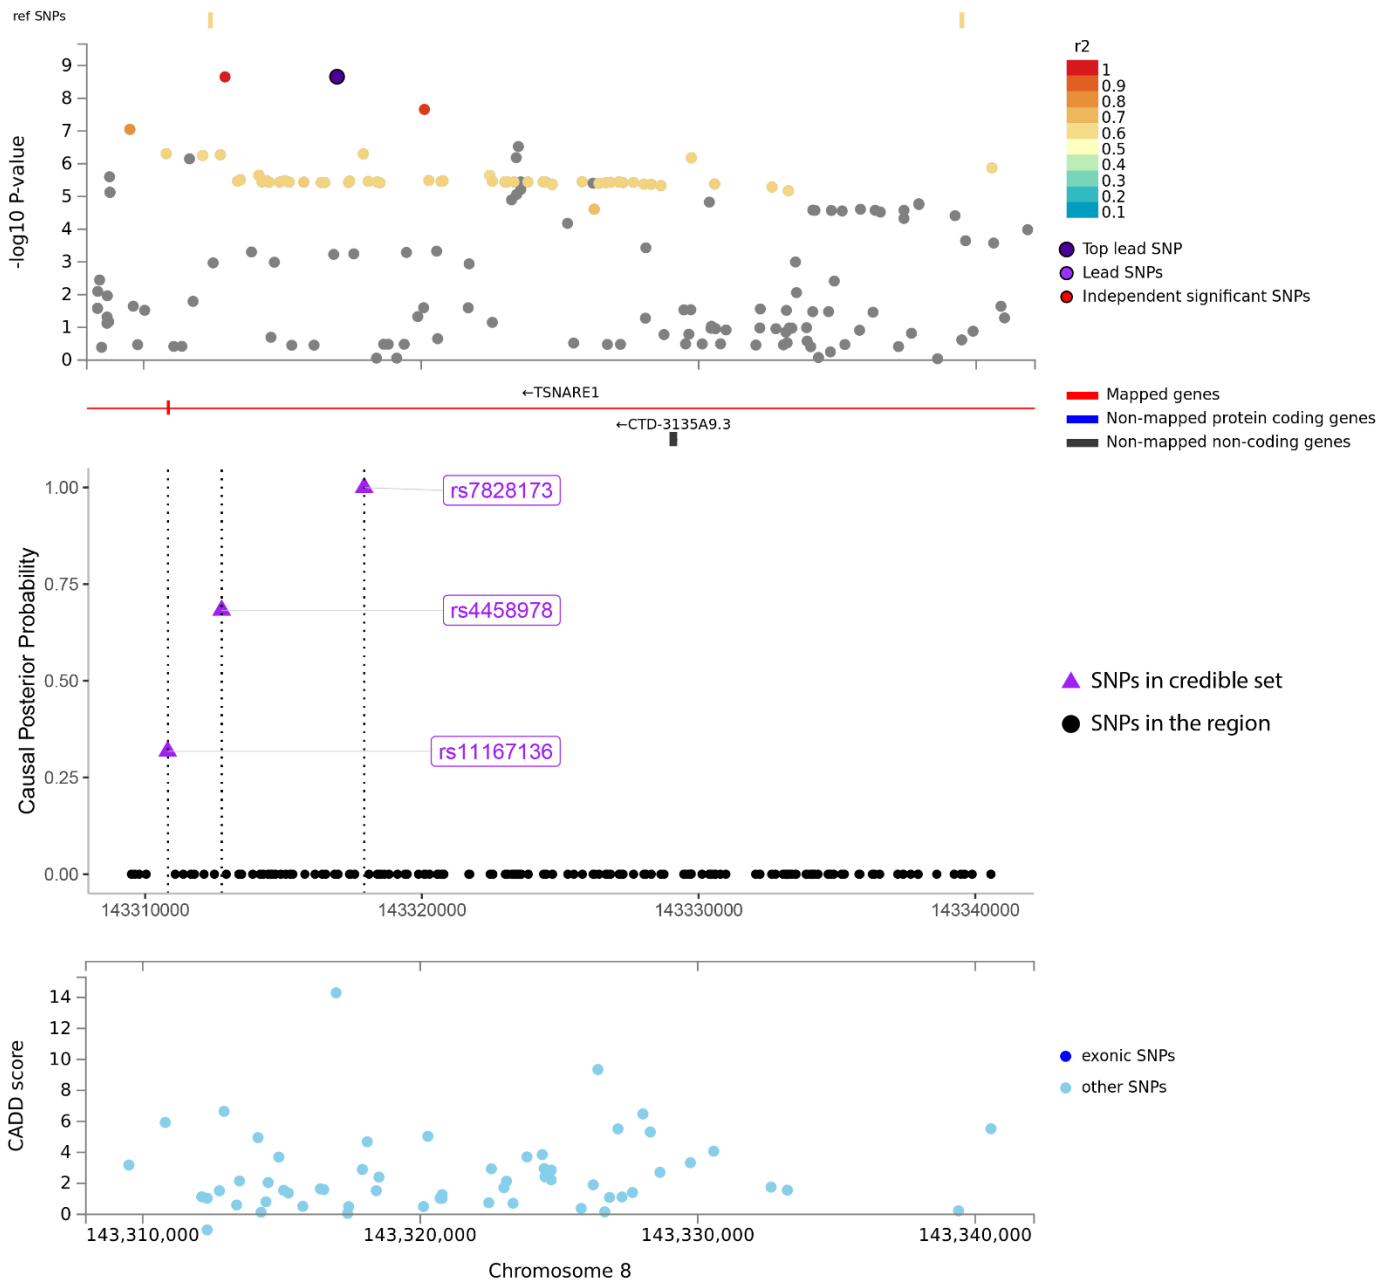

Figure 8: Fine mapping of the risk loci identified from FUMA.

The top panel shows regional association of SNPs in the locus. The y-axis is  $-\log_{10}$  of p-values for each SNP.

The middle panel finemaps all the SNPs in the region using CAVIAR where SNPs labelled and marked as triangles were identified as credible set. The y-axis is posterior probability of SNPs.

The bottom panel shows the CADD score (y-axis) for the SNPs in the region. The x-axis in all panels represents genomic location (base pair) of the locus.

# chr9:140241209-140278206

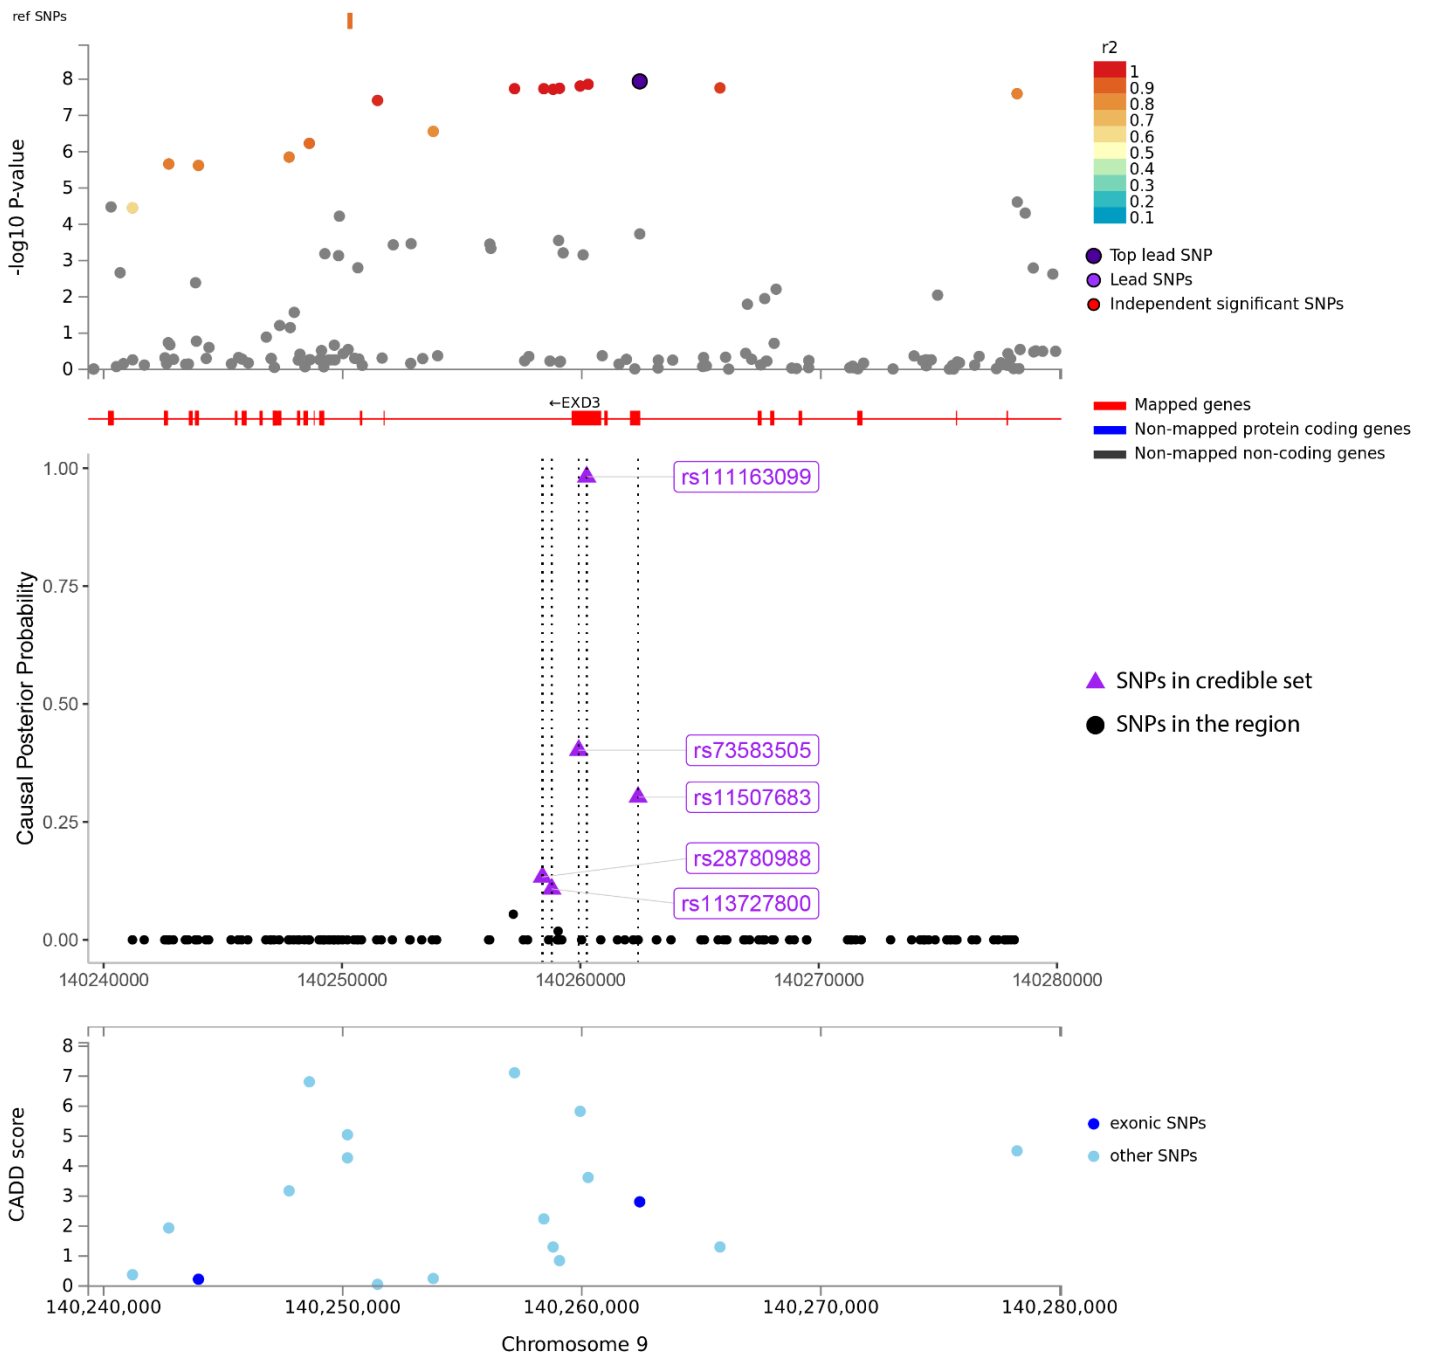

Figure 9: Fine mapping of the risk loci identified from FUMA. The top panel shows regional association of SNPs in the locus. The y-axis is  $-\log_{10}$  of p-values for each SNP. The middle panel finemaps all the SNPs in the region using CAVIAR where SNPs labelled and marked as triangles were identified as credible set. The y-axis is posterior probability of SNPs. The bottom panel shows the CADD score (y-axis) for the SNPs in the region. The x-axis in all panels represents genomic location (base pair) of the locus.

# chr11:133531999-133561399

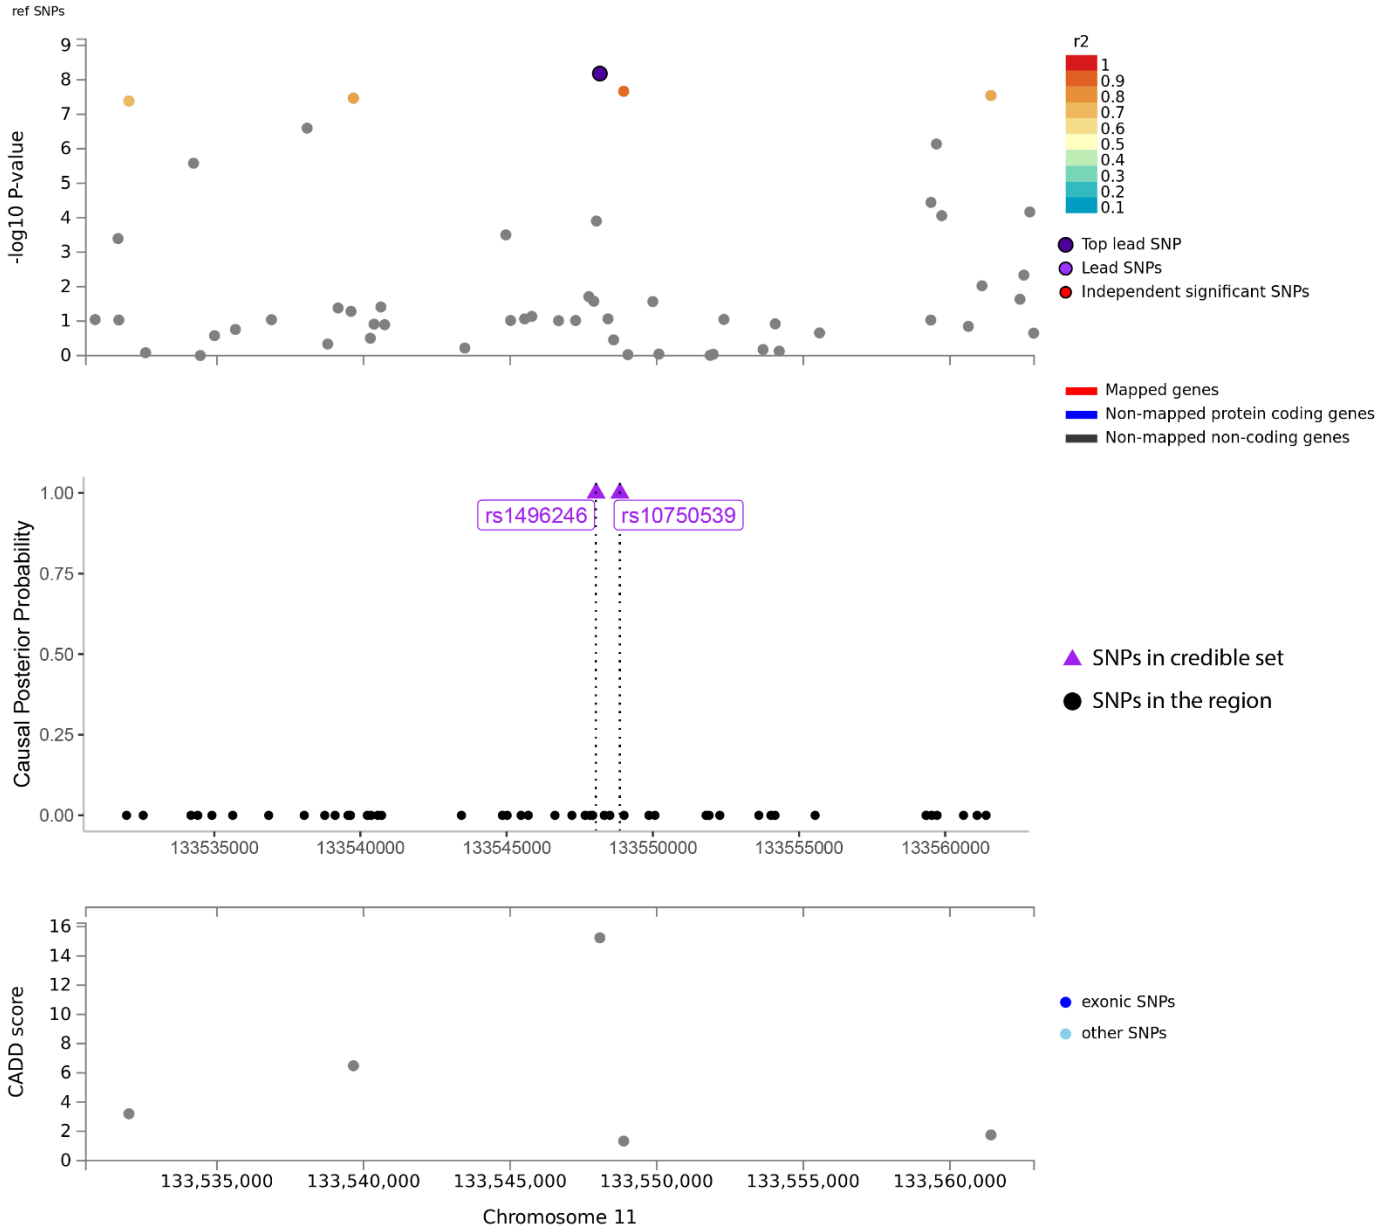

Figure 10: Fine mapping of the risk loci identified from FUMA.

The top panel shows regional association of SNPs in the locus. The y-axis is  $-\log_{10}$  of p-values for each SNP.

The middle panel finemaps all the SNPs in the region using CAVIAR where SNPs labelled and marked as triangles were identified as credible set. The y-axis is posterior probability of SNPs.

The bottom panel shows the CADD score (y-axis) for the SNPs in the region. The x-axis in all panels represents genomic location (base pair) of the locus.

# chr17:42785473-44865603

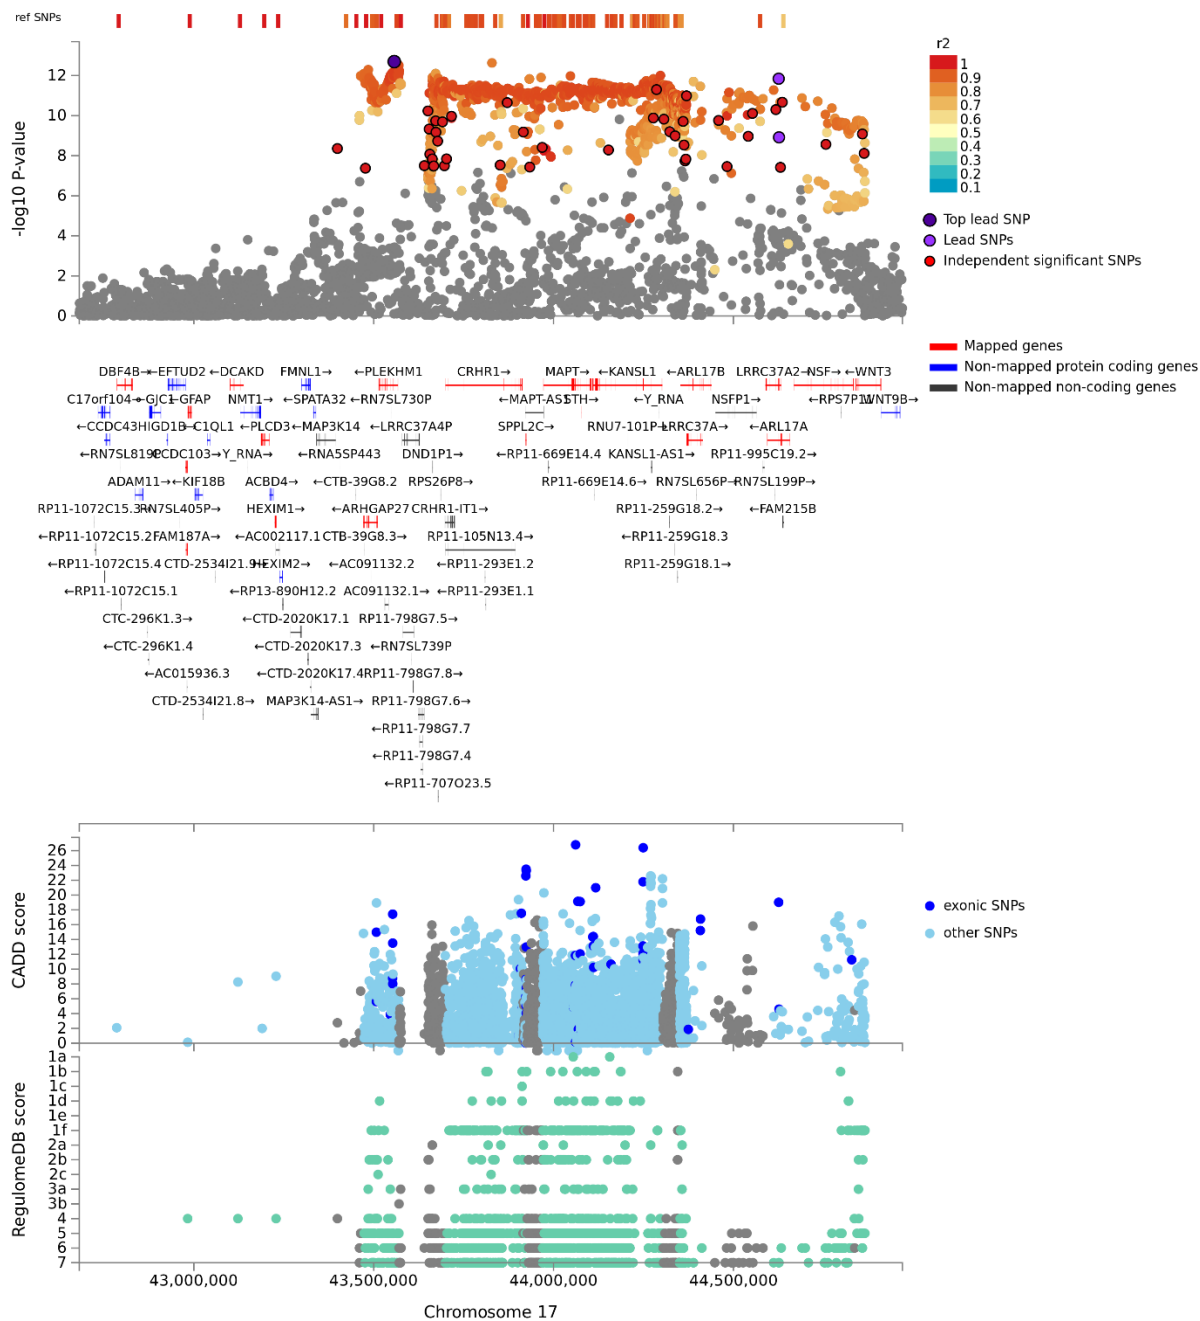

Figure 11: Risk loci identified from FUMA.

The top panel shows regional association of SNPs in the locus. The y-axis is  $-\log_{10}$  of p-values for each SNP.

The middle panel shows the CADD score (y-axis) for the SNPs in the region.

The bottom panel shows scores of transcriptional activity as catalogued in RegulomeDB. The legend of the scores is shown on the right. The x-axis in all panels represents genomic location (base pair) of the locus.

Note: Finemapping is unable to prioritize variants in this region due to high association and complex LD pattern.

## Regulome DB

### RegulomeDB Categorical Scores

| Category | Description                                                                                                                                       |
|----------|---------------------------------------------------------------------------------------------------------------------------------------------------|
| 1a       | Likely to affect binding and linked to expression of a gene target<br>eQTL + TF binding + matched TF motif + matched DNase footprint + DNase peak |
| 1b       | eQTL + TF binding + any motif + DNase footprint + DNase peak                                                                                      |
| 1c       | eQTL + TF binding + matched TF motif + DNase peak                                                                                                 |
| 1d       | eQTL + TF binding + any motif + DNase peak                                                                                                        |
| 1e       | eQTL + TF binding + matched TF motif                                                                                                              |
| 1f       | eQTL + TF binding/DNase peak                                                                                                                      |
| 2a       | Likely to affect binding<br>TF binding + matched TF motif + matched DNase footprint + DNase peak                                                  |
| 2b       | TF binding + any motif + DNase footprint + DNase peak                                                                                             |
| 2c       | TF binding + matched TF motif + DNase peak                                                                                                        |
| 3a       | Less likely to affect binding<br>TF binding + any motif + DNase peak                                                                              |
| 3b       | TF binding + matched TF motif                                                                                                                     |
| 4        | Minimal binding evidence<br>TF binding + DNase peak                                                                                               |
| 5        | TF binding or DNase peak                                                                                                                          |
| 6        | Motif hit                                                                                                                                         |
| 7        | No binding evidence                                                                                                                               |
| NA       | No evidence<br>the variant does not exist in RegulomeDB                                                                                           |

\*External link to RegulomeDB from SNP table (when one of the SNPs is clicked) will open a new tab. rsID does not always match since RegulomeDB used dbSNP build 141 (the rsID in FUMA is dbSNP build 146). Genomic position (bp on hg19) shown in the link of RegulomeDB is the position shown in the SNP table - 1, since RegulomeDB used 0 based coordinate.

# chr18:53190188-53393895

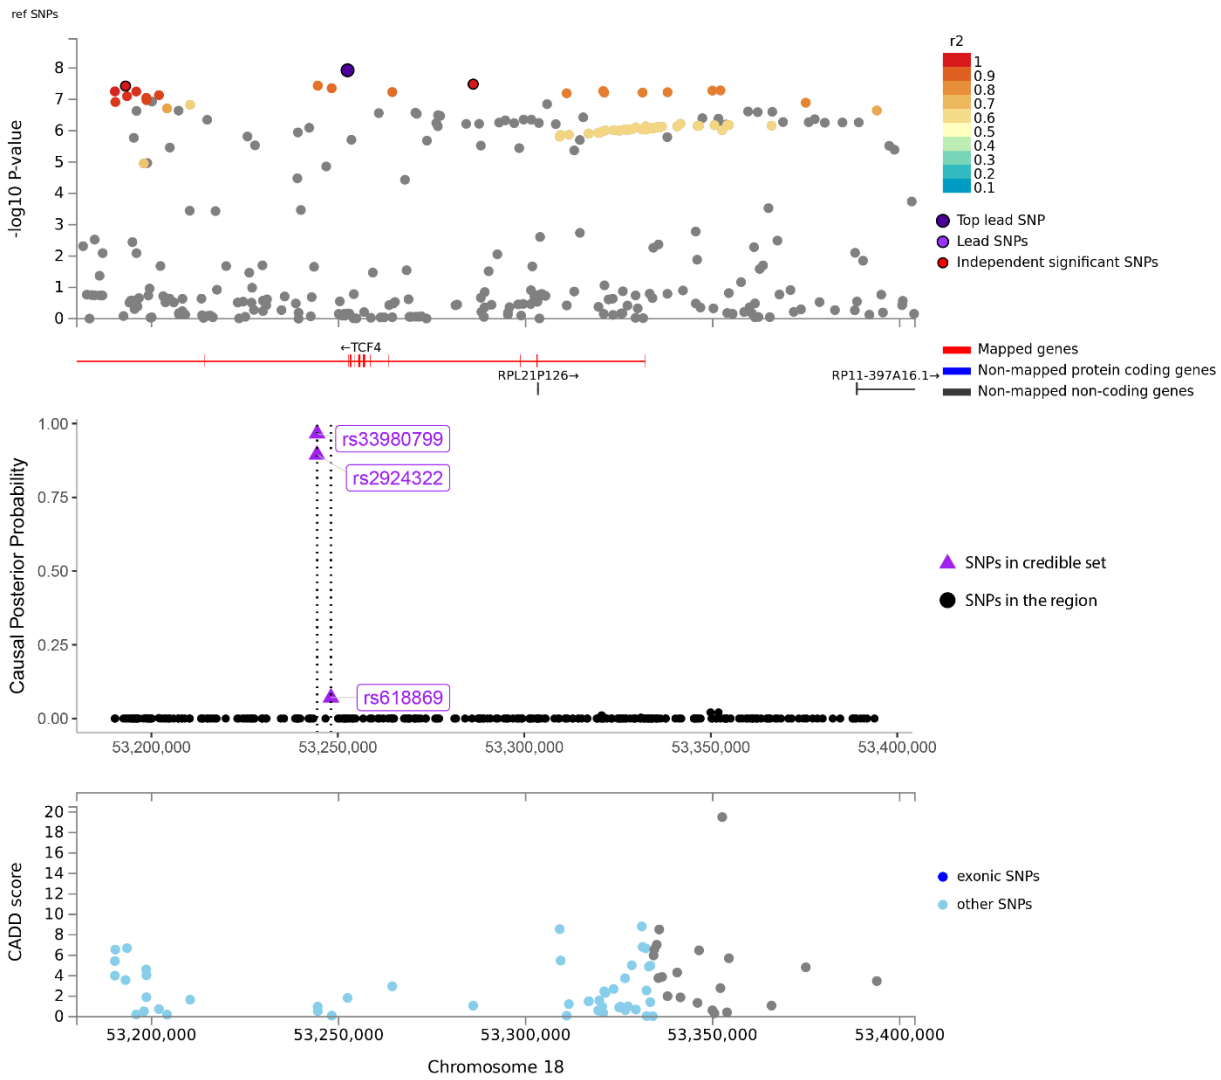

Figure 12: Fine mapping of the risk loci identified from FUMA.

The top panel shows regional association of SNPs in the locus. The y-axis is  $-\log_{10}$  of p-values for each SNP.

The middle panel finemaps all the SNPs in the region using CAVIAR where SNPs labelled and marked as triangles were identified as credible set. The y-axis is posterior probability of SNPs.

The bottom panel shows the CADD score (y-axis) for the SNPs in the region. The x-axis in all panels represents genomic location (base pair) of the locus.

# chr19:18669987-18730695

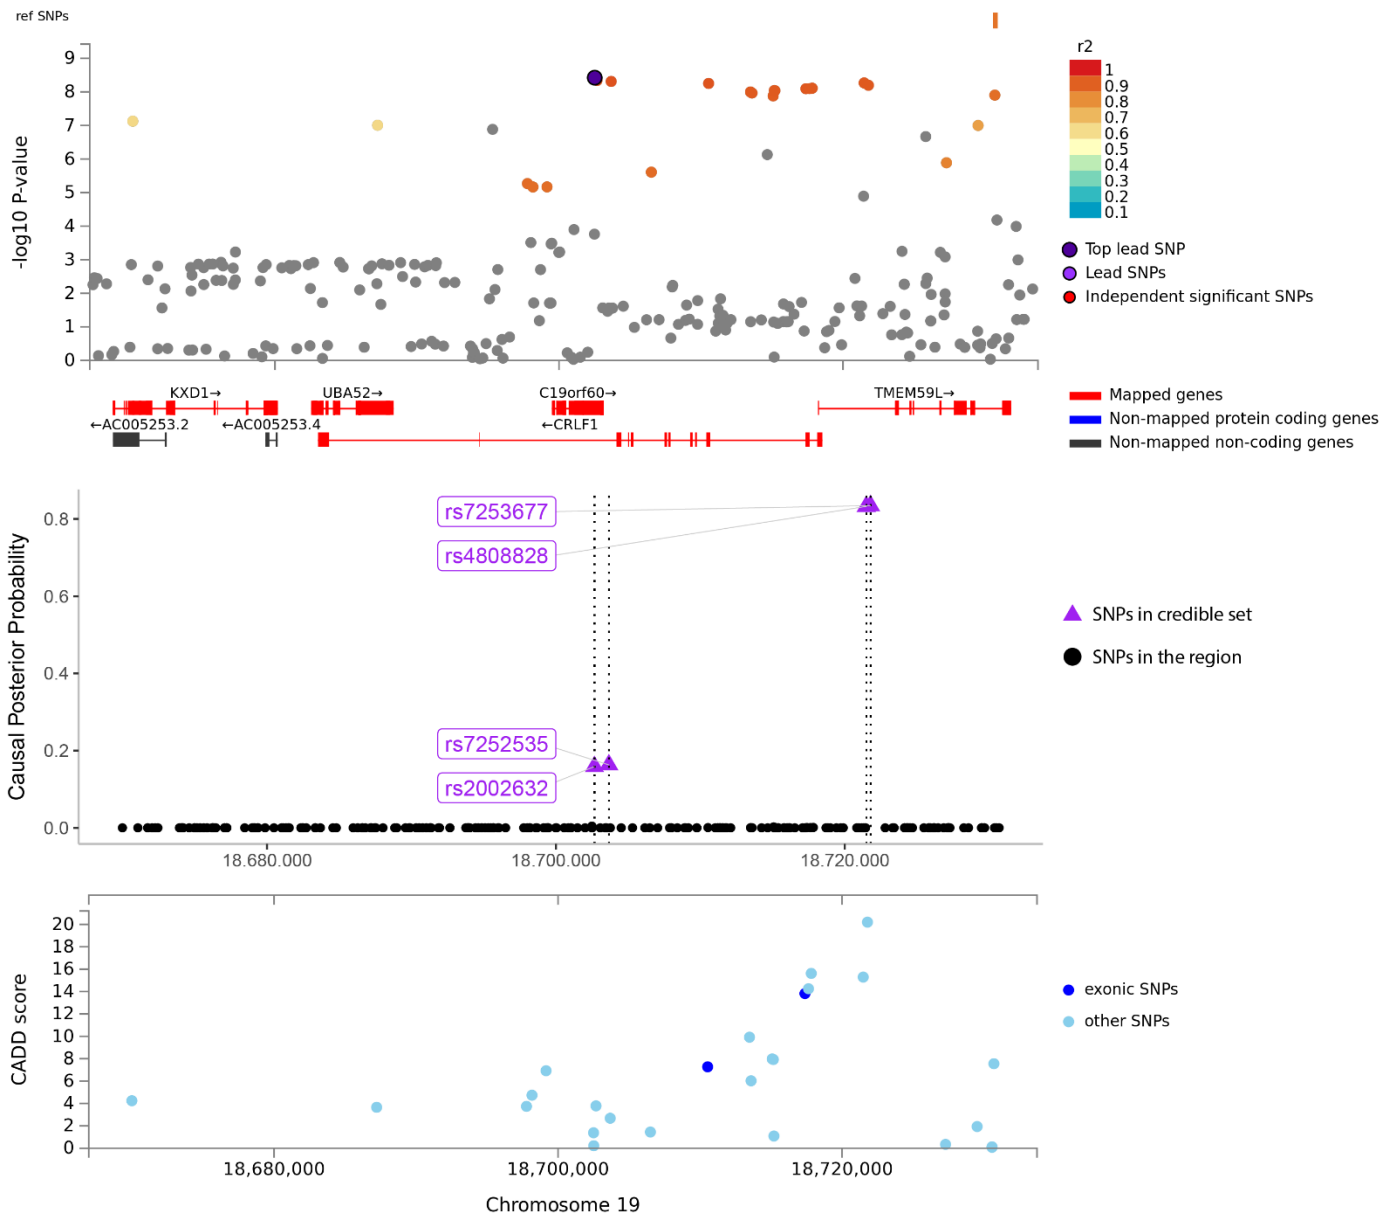

Figure 13: Fine mapping of the risk loci identified from FUMA.

The top panel shows regional association of SNPs in the locus. The y-axis is  $-\log_{10}$  of p-values for each SNP.

The middle panel finemaps all the SNPs in the region using CAVIAR where SNPs labelled and marked as triangles were identified as credible set. The y-axis is posterior probability of SNPs.

The bottom panel shows the CADD score (y-axis) for the SNPs in the region. The x-axis in all panels represents genomic location (base pair) of the locus.

# Figure 2: Summary of risk loci for EHR-binary

## A: EUR population

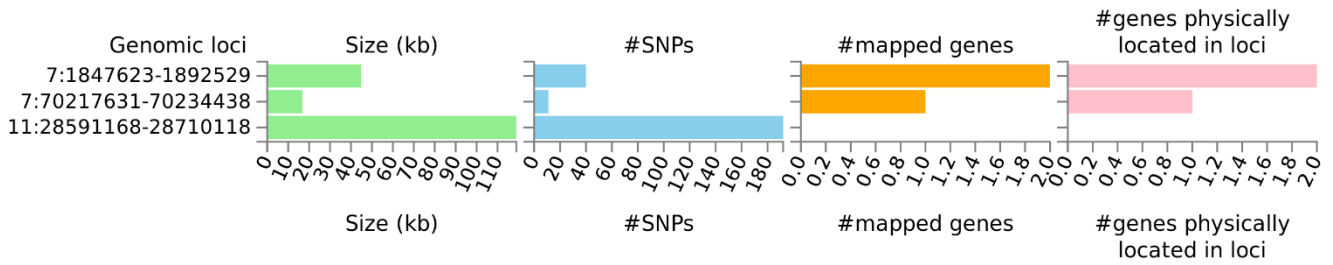

## B: AFR-AM population

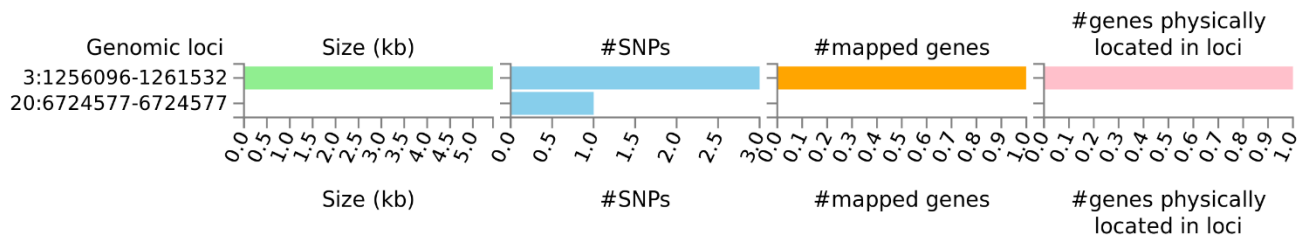

# chr7:1847623-1892529 (EUR)

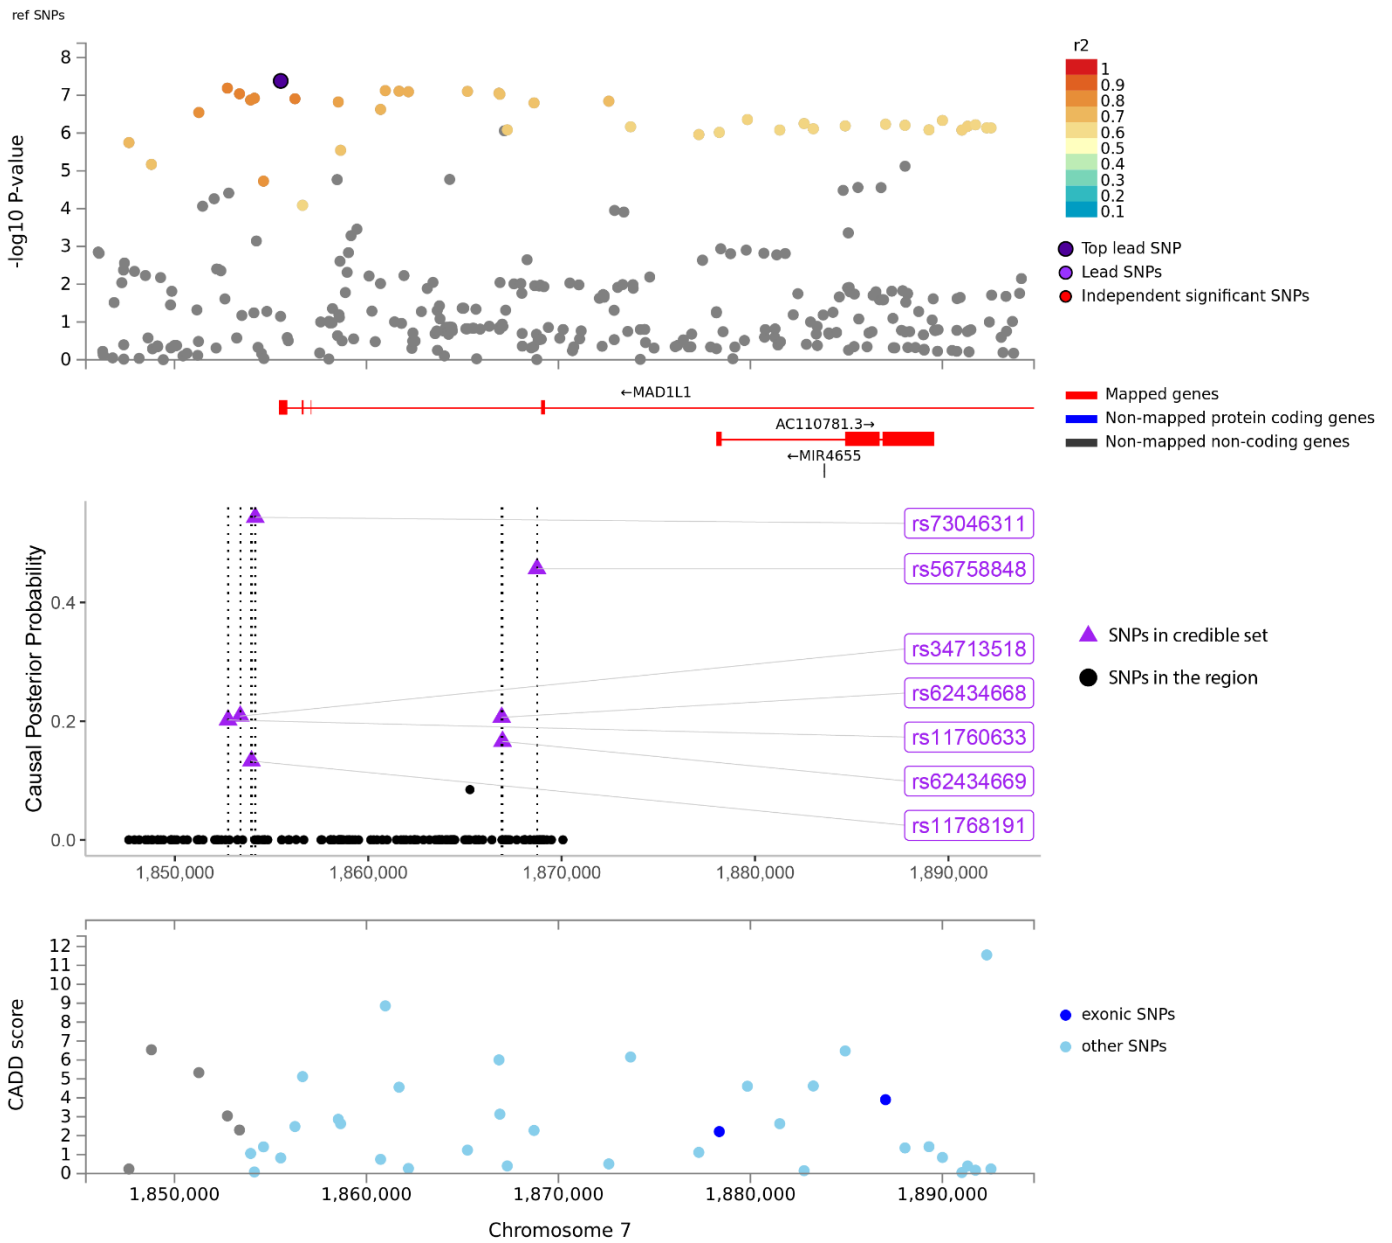

Figure 15: Fine mapping of the risk loci identified from FUMA.

The top panel shows regional association of SNPs in the locus. The y-axis is  $-\log_{10}$  of p-values for each SNP.

The middle panel finemaps all the SNPs in the region using CAVIAR where SNPs labelled and marked as triangles were identified as credible set. The y-axis is posterior probability of SNPs.

The bottom panel shows the CADD score (y-axis) for the SNPs in the region. The x-axis in all panels represents genomic location (base pair) of the locus.



# chr7:70217631-70234438 (EUR)

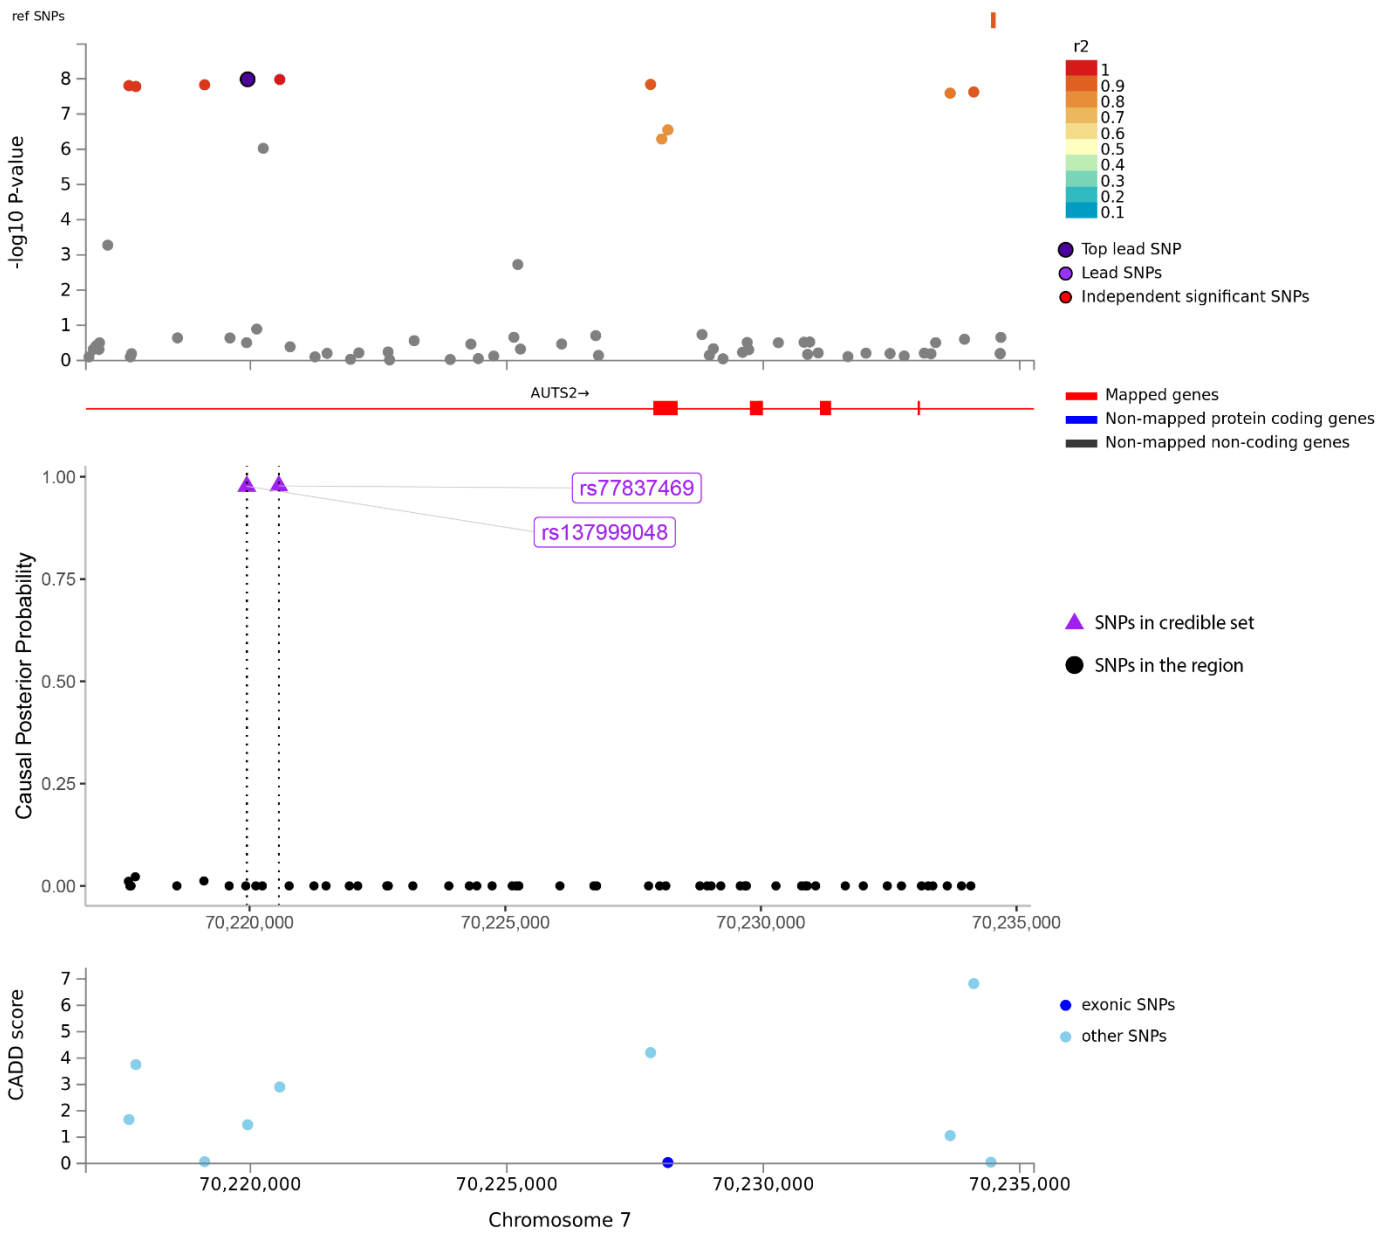

Figure 16: Fine mapping of the risk loci identified from FUMA.

The top panel shows regional association of SNPs in the locus. The y-axis is  $-\log_{10}$  of p-values for each SNP.

The middle panel finemaps all the SNPs in the region using CAVIAR where SNPs labelled and marked as triangles were identified as credible set. The y-axis is posterior probability of SNPs.

The bottom panel shows the CADD score (y-axis) for the SNPs in the region. The x-axis in all panels represents genomic location (base pair) of the locus.

# chr11:28591168-28710118 (EUR)

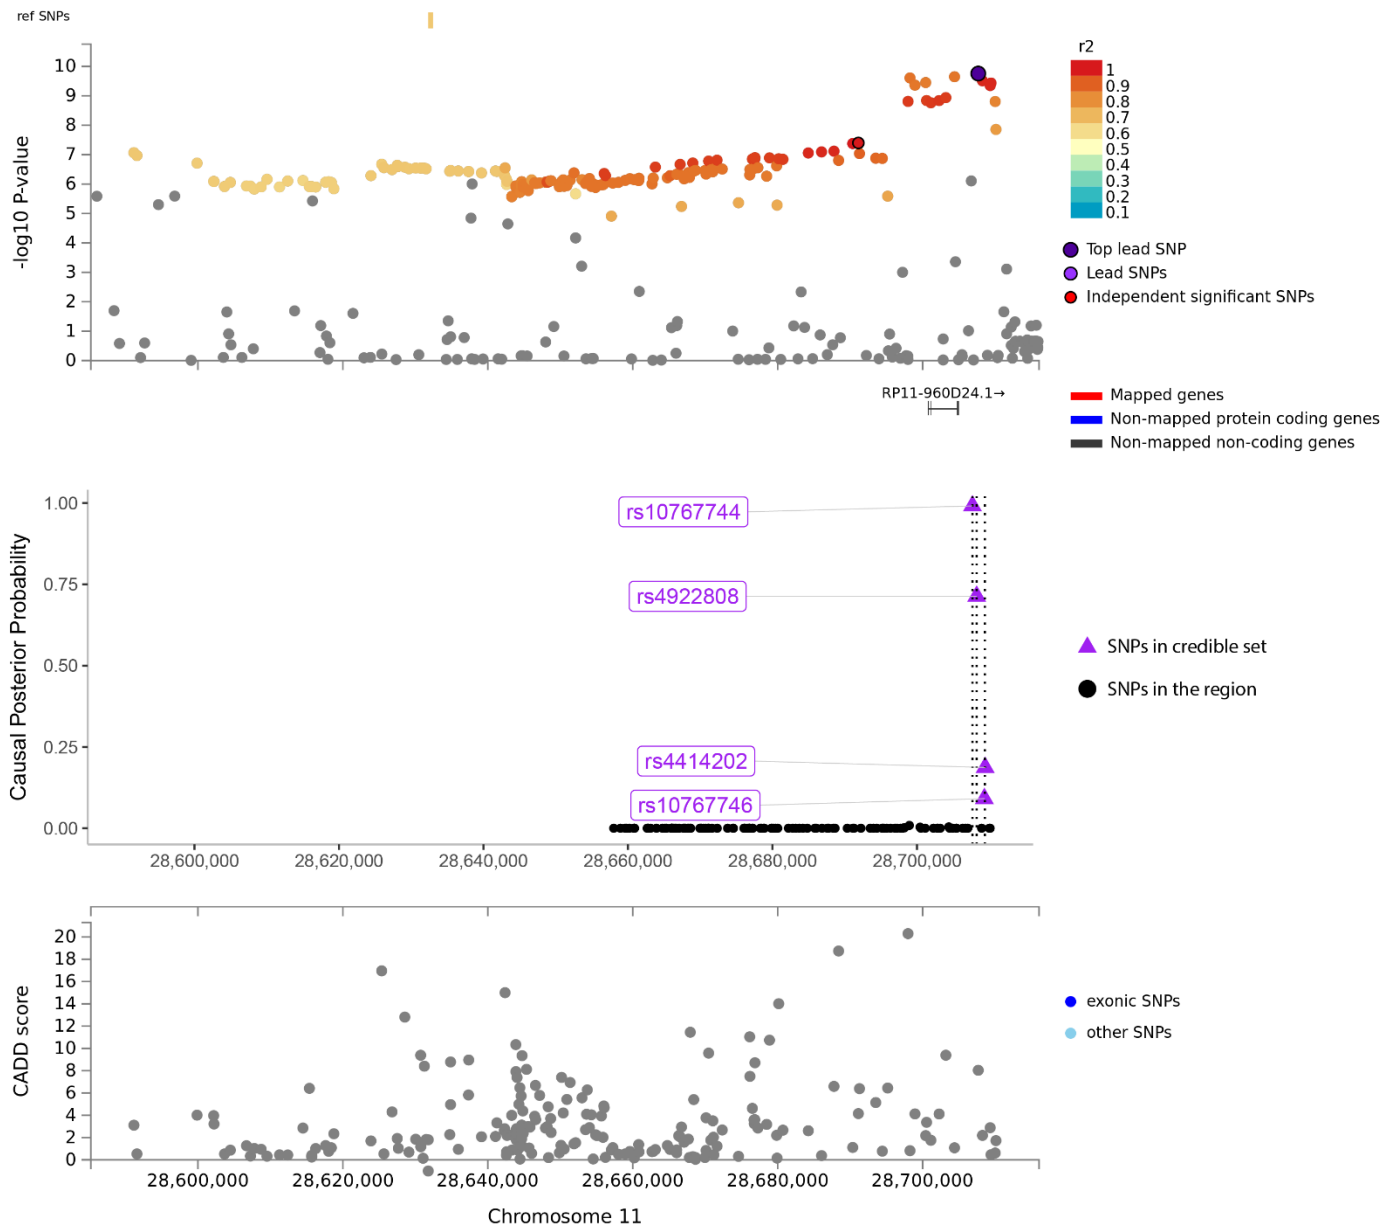

Figure 17: Fine mapping of the risk loci identified from FUMA.

The top panel shows regional association of SNPs in the locus. The y-axis is  $-\log_{10}$  of p-values for each SNP.

The middle panel finemaps all the SNPs in the region using CAVIAR where SNPs labelled and marked as triangles were identified as credible set. The y-axis is posterior probability of SNPs.

The bottom panel shows the CADD score (y-axis) for the SNPs in the region. The x-axis in all panels represents genomic location (base pair) of the locus.

## chr3:1256096-1261532 (AFR)

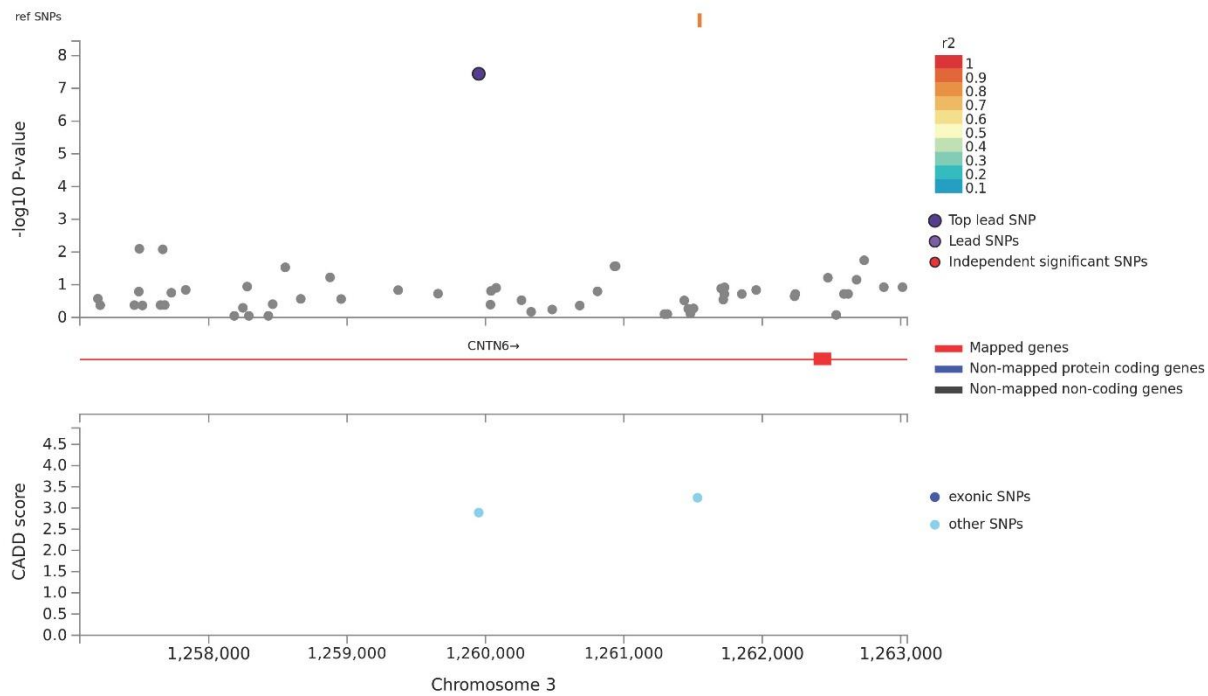

Figure 18: Risk loci identified from FUMA in African American population.

The top panel shows regional association of SNPs in the locus. The y-axis is  $-\log_{10}$  of p-values for each SNP.

The bottom panel shows the CADD score (y-axis) for the SNPs in the region. The x-axis in all panels represents genomic location (base pair) of the locus.

Note: Fine-mapping is not applicable at this loci since there are no SNPs in LD with the lead SNP.

## chr20:6724577-6724577 (AFR)

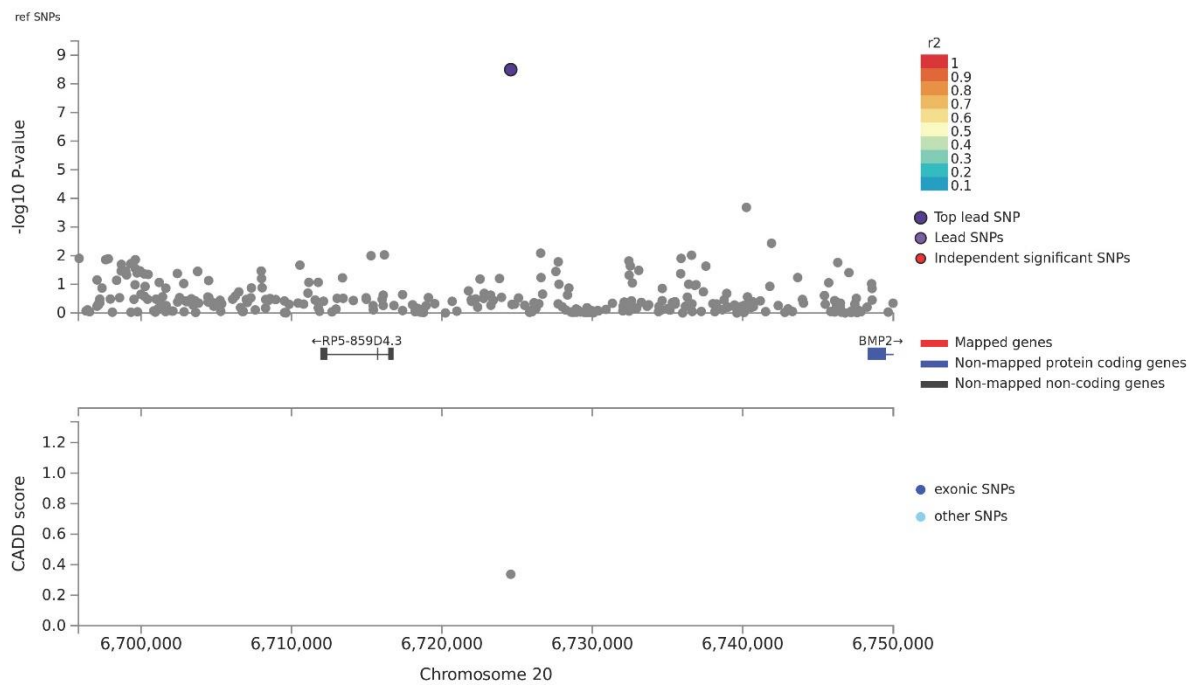

Figure 19: Risk loci identified from FUMA in African American population.

The top panel shows regional association of SNPs in the locus. The y-axis is  $-\log_{10}$  of p-values for each SNP.

The bottom panel shows the CADD score (y-axis) for the SNPs in the region. The x-axis in all panels represents genomic location (base pair) of the locus.

Note: Fine-mapping is not applicable at this loci since there are no SNPs in LD with the lead SNP.
